# Supplementary material for: Can non-responders be ‘rescued’ by increasing exercise intensity? A quasi-experimental trial of individual responses among humans living with pre-diabetes or type 2 diabetes mellitus in Canada
Source: PubMed Central journal article supplement — BMJ Open. 2021 Apr 5;11(4):e044478. doi: 10.1136/bmjopen-2020-044478 (PMC8030485; doi:10.1136/bmjopen-2020-044478), 2021-04-05
Supplement: bmjopen-2020-044478.draft_revisions.pdf [file bmjopen-2020-044478.draft_revisions.pdf]

# BMJ Open

BMJ Open is committed to open peer review. As part of this commitment we make the peer review history of every article we publish publicly available.

When an article is published we post the peer reviewers' comments and the authors' responses online. We also post the versions of the paper that were used during peer review. These are the versions that the peer review comments apply to.

The versions of the paper that follow are the versions that were submitted during the peer review process. They are not the versions of record or the final published versions. They should not be cited or distributed as the published version of this manuscript.

BMJ Open is an open access journal and the full, final, typeset and author-corrected version of record of the manuscript is available on our site with no access controls, subscription charges or pay-per-view fees (<http://bmjopen.bmj.com>).

If you have any questions on BMJ Open's open peer review process please email [info.bmjopen@bmj.com](mailto:info.bmjopen@bmj.com)

# BMJ Open

## Protocol for the INTENSITY study: Improving individual glycemic response with exercise INTENSITY

|                               |                                                                                                                                                                                                                                                                                                                                             |
|-------------------------------|---------------------------------------------------------------------------------------------------------------------------------------------------------------------------------------------------------------------------------------------------------------------------------------------------------------------------------------------|
| Journal:                      | <i>BMJ Open</i>                                                                                                                                                                                                                                                                                                                             |
| Manuscript ID                 | bmjopen-2020-044478                                                                                                                                                                                                                                                                                                                         |
| Article Type:                 | Protocol                                                                                                                                                                                                                                                                                                                                    |
| Date Submitted by the Author: | 08-Sep-2020                                                                                                                                                                                                                                                                                                                                 |
| Complete List of Authors:     | Hrubeniuk, Travis; Cardiometabolic Exercise and Lifestyle Lab, ; University of New Brunswick, Interdisciplinary Studies<br>Bouchard, Danielle; University of New Brunswick,<br>Gurd, Brendon; Queen's University, Kinesiology<br>Senechal, Martin; University of New Brunswick, Kinesiology;<br>Cardiometabolic Exercise and Lifestyle Lab, |
| Keywords:                     | DIABETES & ENDOCRINOLOGY, SPORTS MEDICINE, General diabetes <<br>DIABETES & ENDOCRINOLOGY                                                                                                                                                                                                                                                   |
|                               |                                                                                                                                                                                                                                                                                                                                             |

SCHOLARONE™  
Manuscripts

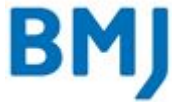

I, the Submitting Author has the right to grant and does grant on behalf of all authors of the Work (as defined in the below author licence), an exclusive licence and/or a non-exclusive licence for contributions from authors who are: i) UK Crown employees; ii) where BMJ has agreed a CC-BY licence shall apply, and/or iii) in accordance with the terms applicable for US Federal Government officers or employees acting as part of their official duties; on a worldwide, perpetual, irrevocable, royalty-free basis to BMJ Publishing Group Ltd ("BMJ") its licensees and where the relevant Journal is co-owned by BMJ to the co-owners of the Journal, to publish the Work in this journal and any other BMJ products and to exploit all rights, as set out in our [licence](#).

The Submitting Author accepts and understands that any supply made under these terms is made by BMJ to the Submitting Author unless you are acting as an employee on behalf of your employer or a postgraduate student of an affiliated institution which is paying any applicable article publishing charge ("APC") for Open Access articles. Where the Submitting Author wishes to make the Work available on an Open Access basis (and intends to pay the relevant APC), the terms of reuse of such Open Access shall be governed by a Creative Commons licence – details of these licences and which [Creative Commons](#) licence will apply to this Work are set out in our licence referred to above.

Other than as permitted in any relevant BMJ Author's Self Archiving Policies, I confirm this Work has not been accepted for publication elsewhere, is not being considered for publication elsewhere and does not duplicate material already published. I confirm all authors consent to publication of this Work and authorise the granting of this licence.

1  
2  
3 Protocol for the INTENSITY study: Improving iNdividual glycemic response with exercise  
4  
5 inTENSITY  
6  
7  
8  
9

10 Travis J. Hrubeniuk,<sup>1,2</sup> Danielle R. Bouchard,<sup>2,3</sup> Brendon J. Gurd,<sup>4</sup> Martin Sénéchal<sup>2,3</sup>

11  
12 <sup>1</sup>Interdisciplinary Studies, School of Graduate Studies, University of New Brunswick  
13

14 <sup>2</sup>Cardiometabolic Exercise and Lifestyle Laboratory, University of New Brunswick  
15

16  
17 <sup>3</sup>Faculty of Kinesiology, University of New Brunswick  
18

19 <sup>4</sup>Queen's University, School of Kinesiology and Health Studies  
20  
21  
22  
23

24 **Corresponding Author**

25  
26 Dr. Martin Sénéchal, PhD, CEP  
27

28 Associate Professor, Faculty of Kinesiology, University of New Brunswick  
29

30 90 Mackay Drive, Room 319  
31

32 Fredericton, New Brunswick,  
33

34  
35 Canada, E3B 5A3  
36

37 Phone: (506) 451-6889  
38

39 Fax: (506) 453-3511  
40

41 Email: msenecha@unb.ca  
42  
43  
44  
45  
46  
47  
48  
49  
50  
51  
52  
53  
54  
55  
56  
57  
58  
59  
60

**Trial Registration**

This trial has been registered on ClinicalTrials.gov (NCT03787836)

**Study Protocol**

Version 3.0, dated May 8<sup>th</sup>, 2019

**Study Sponsors**

Sponsor: New Brunswick Health Research Foundation

Address: 10 Knowledge Park Dr. Suite 100, Fredericton NB, Canada, E3C 2M7.

Email: info@nbhrf.com

Phone Number: (506) 455-8886

Sponsor: The Heart and Stroke Foundation New Brunswick

Address: 580 Main St b210, Saint John, NB E2K 1J5

Email: ksisk@hsf.nb.ca

Phone Number: 506-634-1620

## Abstract

**Introduction:** Exercise is recommended to improve glycemic control. Yet, individual changes in glycemic control following exercise can vary greatly, meaning while some significantly improve others, coined ‘non-responders’, do not. Increasing the intensity of exercise may ‘rescue’ non-responders and help generate a response to training. This trial will identify non-responders to changes in glycated hemoglobin (HbA1c) across inactive individuals living with prediabetes or type 2 diabetes mellitus (T2DM) following an aerobic exercise program and evaluate if increasing training intensity will elicit beneficial changes to ‘rescue’ previously categorized non-responders.

**Methods and analysis:** This study will recruit 60 participants for a two-phase aerobic exercise training program. Participants will be assigned to a control or intervention group. Control participants will maintain their current lifestyle habits. During Phase One, intervention participants will complete 16 weeks of aerobic exercise at an intensity of 4.5 metabolic equivalents (METs) for 150 minutes per week. Participants will then be categorized as responders or non-responders based on the change in HbA1c. For Phase Two, participants will be blocked based on responder status and randomly allocated to a maintained intensity, or increased intensity group for 12 weeks. The maintained group will continue to train at 4.5 METs, while the increased intensity group will train at 6.0 METs for 150 minutes per week.

**Ethics and dissemination:** Results will be presented at scientific meetings and submitted to peer-reviewed journals. Publications and presentations related to the study will be authorized and reviewed by all investigators. Findings from this study will be used to provide support for future randomized control trials. All experimental procedures have been approved by the Research Ethics Board at the University of New Brunswick (REB: 2018-168).

**Trial registration:** This trial has been registered on ClinicalTrials.gov (NCT03787836).

## Article Summary

### *Strengths and Limitations*

- Participants will be allocated, not randomized, to control and intervention groups for Phase One, as data from the control group is required to estimate variance and allow for the accurate categorization of intervention participants prior to subsequent randomization to exercise intensity branches in Phase Two.
- Multiple measurements of the primary outcome are taken at each timepoint to increase reliability.
- An absolute measure of exercise intensity will be prescribed to equalize energy expenditure across all participants.

## Introduction

Organizations around the globe provide standardized exercise recommendations to reduce the onset of chronic disease and premature mortality.<sup>[1-5]</sup> However, observed changes following a typical exercise program are often heterogenous. This heterogeneity can result in individuals not experiencing the desired benefits of standard exercise training, and being labelled as ‘exercise non-responders’. Attempts to quantify the observed heterogeneity, known as interindividual variation, and/or estimate the prevalence of non-responders have recently proliferated.<sup>[6-15]</sup>

Research designed to identify non-responders has primarily focused on cardiorespiratory fitness in apparently healthy adults. Moreover, attempts to categorize youth<sup>[6,15]</sup> and adult<sup>[9,11,13,14]</sup> participants as responders or non-responders based on cardiometabolic outcomes have not often included a time-matched control group in their analysis. Opting to use single-group study designs or reliability data to set response thresholds and categorize participants, produces response rates which reflect the number of participants who improved beyond an estimate of random or measurement error<sup>[10,16,17]</sup>. Alternatively, including a time-matched control group allows an estimate of within-subject variation to be considered when setting a response threshold or calculating individual confidence intervals, encapsulating additional variance and accounting for its impact when making categorizations.<sup>[10,18,19]</sup>

Labeling individuals who do not experience the intended benefits following an exercise program as non-responders can be problematic for several reasons, including the substantial influence a subjectively chosen threshold has on response categorizations, the high likelihood that a non-responder experienced a beneficial change in a secondary outcome, and the specificity of a response categorization to the provided intervention.<sup>[10,11,20,21]</sup> Accordingly, adapting exercise protocols for individuals initially categorized as non-responders may garner beneficial changes in



1  
2  
3 the primary outcome, and thereby ‘rescue’, those individuals from their non-responder status.<sup>[22]</sup>  
4  
5  
6 Montero and Lundby (2017) highlighted the potential effectiveness of such efforts, using a 120-  
7  
8 minute increase in weekly exercise volume to rescue a group of 21 apparently healthy, young adult,  
9  
10 male non-responders from their original categorization.<sup>[12]</sup> Less is known, however, about the  
11  
12 ability of adapting exercise training intensity to rescue non-responders. One study from Ross et  
13  
14 al., (2015) allocated 121 sedentary adults living with obesity to one of three groups for 24 weeks  
15  
16 of exercise training: (1) low-volume, low-intensity; (2) high-volume, low-intensity; or (3) high-  
17  
18 volume, high-intensity.<sup>[8]</sup> The authors found doubling the training volume (group 1 vs. 2) led to a  
19  
20 50% decrease in non-response, whereas increasing the intensity and volume (group 3) only  
21  
22 produced responders. While these findings suggest an increase in exercise intensity can increase  
23  
24 the overall proportion of responders, it remains unknown if this would translate to specific  
25  
26 improvements in those previously categorized as non-responders. Moreover, no such work has  
27  
28 been conducted with those living with prediabetes or T2DM or using an indicator of glycemic  
29  
30 control as the primary outcome.  
31  
32  
33

34  
35 The INTENSITY study is a two-phase, quasi-experimental trial. The objectives are to:

- 36  
37 1. Identify the number of exercise non-responders, based on the observed changes in HbA1c,  
38  
39 across individuals living with prediabetes or T2DM following 16 weeks of continuous  
40  
41 aerobic exercise training.  
42  
43
- 44  
45 2. Explore if increasing the intensity and/or increasing the duration of exercise training by 12  
46  
47 weeks will ‘rescue’ previously identified non-responders by garnering improvements in  
48  
49 HbA1c.  
50

51 For the purpose of this analysis, an exercise responder will be defined as any individual who has  
52  
53 experienced a decrease in HbA1c beyond the minimal clinically important difference (MCID)  
54  
55  
56  
57  
58  
59

1  
2  
3 following participation in the provided exercise trail, while accounting for the variation-induced  
4 changes in HbA1c experienced by the time-matched control group. We hypothesize that a  
5 significant proportion of participants will be categorized as non-responders following participation  
6 in the exercise program, and increasing the intensity of exercise training will rescue the previously  
7 identified non-responders by producing beneficial changes in HbA1c.  
8  
9  
10  
11  
12  
13

## 14 **Methods and analysis**

### 15 *Study setting*

16  
17  
18  
19 The INTENSITY trial will be conducted at the University of New Brunswick in  
20 Fredericton, New Brunswick, Canada. This location was chosen due to the available equipment,  
21 ease of access for participants, availability of a private exercise facility for the delivery of the  
22 training protocol, and the relatively high rates of T2DM throughout the province.<sup>[23]</sup>  
23  
24  
25  
26  
27

### 28 *Eligibility criteria*

29  
30  
31 Inclusion criteria:

- 32  
33 1. Community-dwelling adults aged 19 years or older.
- 34  
35 2. Currently living with prediabetes or T2DM as diagnosed by a physician and confirmed by  
36  
37 an HbA1c value of 5.7% or above, as verified by duplicate testing.
- 38  
39 3. Not currently partaking in a self-reported regular physical activity regimen, defined as  
40  
41 consistent participation in running or jogging activity, attending physical activity or  
42  
43 exercise classes on a weekly basis, or averaging 10,000 steps per day or more over the  
44  
45 course of 7 days.  
46  
47  
48

49  
50 Exclusion criteria:

- 51  
52 1. Currently diagnosed as having, or being treated for, low iron concentrations or anemia.
- 53  
54 2. Diagnosed with any red blood cell altering condition.  
55  
56  
57  
58  
59  
60

- 1
- 2
- 3 3. Currently living with any cardiovascular disease which would impact the ability to safely
- 4 participate in exercise training.
- 5
- 6
- 7
- 8 4. Currently prescribed any medication which would impact the ability to use a heart rate
- 9 monitor to accurately track exercise intensity.
- 10
- 11

### 12 ***Recruitment***

13  
14 Participants will be recruited from the city of Fredericton, New Brunswick, Canada, and  
15 the surrounding area using advertisements placed in participating grocery stores, pharmacies,  
16 health care centers, physician offices, and on social media. The research team will also use internal  
17 newsletters and electronic communication platforms to inform staff and students at the University  
18 of New Brunswick and St. Thomas University of the study. Partnerships with the local branches  
19 of Diabetes Canada and government-funded diabetes education and support programs will allow  
20 for research staff to attend meetings and distribute advertisements to clients.  
21  
22  
23  
24  
25  
26  
27  
28  
29

### 30 ***Patient and Public Involvement***

31  
32 Prior to designing the study, 65 patients living with T2DM in Fredericton, New Brunswick  
33 and the surrounding area who previously engaged in an exercise-based lifestyle intervention  
34 program were consulted by the research team to help ensure relevance of the research purpose to  
35 this population, and provide effective dissemination input. As a results, findings will be provided  
36 to study participants on an individual basis via their requested means of communication, and the  
37 research team will host a public event to discuss the findings, what they mean, and how they may  
38 be implemented by interested stakeholders.  
39  
40  
41  
42  
43  
44  
45  
46  
47  
48

### 49 ***Interventions***

50  
51 Participation in the INTENSITY trial will take place across two distinct phases (Figure 1).  
52

#### 53 ***Phase One***

1  
2  
3 Eligible participants will be assigned to one of a control or intervention group. Allocation  
4 will be based on the time of recruitment, with the first participants assigned to the control condition  
5 until group capacity is reached. All subsequent participants will be assigned to the intervention.  
6 Allocation was chosen in favour of randomization during Phase One, as data from the control  
7 group is required to estimate measurement variance and allow for the accurate categorization of  
8 intervention participants prior to randomization in Phase Two.  
9

10  
11  
12  
13  
14  
15  
16  
17 Participants allocated to the control group will receive no exercise advice or instruction.  
18 Control participants will be instructed to maintain current lifestyle habits, contacted monthly to  
19 ensure continued enrollment and answer pertinent questions, and asked to return for mid-point  
20 testing in 16 weeks. Participants allocated to the intervention group will be scheduled to begin the  
21 first phase of the training protocol within one week of completing all baseline testing. The Phase  
22 One training protocol will last for 16 weeks, requiring participants to exercise at an intensity of  
23 4.5 metabolic equivalents (METs) on a treadmill. An absolute measure of intensity was chosen in  
24 favour of a relative measure of intensity to equalize energy expenditure across all participants. All  
25 exercise will be supervised by research staff and take place in a private exercise facility located on  
26 the University of New Brunswick campus. To maximize attendance exercise sessions will be  
27 scheduled on a weekly basis. Participants will be eased into the program using a four-week  
28 progression, completing 80 minutes of exercise in week one, 100 minutes in week two, 120  
29 minutes in week three, and 135 minutes in week four. For each of the remaining twelve weeks  
30 participants will complete 150 minutes of exercise. Each participant will choose the number of  
31 weekly sessions needed to complete the required time, as long as the total number of sessions is  
32 greater than one. Participants will be allowed to choose the speed and grade of the treadmill during  
33 the exercise time, as long as the prescribed intensity is achieved and maintained for the duration  
34  
35  
36  
37  
38  
39  
40  
41  
42  
43  
44  
45  
46  
47  
48  
49  
50  
51  
52  
53  
54  
55  
56  
57  
58  
59  
60

1  
2  
3 of each session. The supervising research staff will instruct participants to increase or decrease  
4 exercise intensity by increasing or decreasing the speed and/or grade of the treadmill, as necessary.  
5  
6 At the start of every training session participants will be given five minutes to warmup and achieve  
7 the targeted intensity. Warmup time during each session will not count towards the total exercise  
8 time for the week. To account for improvements in cardiorespiratory fitness and ensure  
9 participants train at the appropriate intensity, each participant will be re-evaluated every four  
10 weeks. Based on the observed changes in HbA1c following the 16 weeks of exercise training, each  
11 participant in the intervention group will be categorized as a responder, non-responder, or  
12 uncertain responder.  
13  
14  
15  
16  
17  
18  
19  
20  
21  
22  
23

#### 24 *Phase Two*

25  
26 Participants in the control group will again be instructed to maintain their current lifestyle  
27 habits, contacted monthly to answer any pertinent questions, and asked to return for follow-up  
28 testing in 12 weeks. Participants in the intervention group will be blocked based on their responder  
29 status and randomly allocated to either a maintained exercise group, or an increased intensity  
30 group. Participants in the maintained exercise group will continue the supervised, treadmill-based  
31 aerobic exercise training for 150 minutes per week at an intensity of 4.5 METs, for 12 weeks.  
32  
33 Participants in the increased intensity group will increase the intensity of their supervised,  
34 treadmill-based aerobic exercise to 6.0 METs, for 150 minutes per week. Participant scheduling,  
35 freedom to choose treadmill speed and slope, and supervision will follow the same methods as  
36 applied during Phase One. Likewise, cardiorespiratory fitness will be re-evaluated every four  
37 weeks.  
38  
39  
40  
41  
42  
43  
44  
45  
46  
47  
48  
49  
50

#### 51 *Deviations from protocol*

1  
2  
3 Research staff will emphasize that each participant receives the same dose of exercise (time  
4 and energy expenditure), as differences throughout the intervention group can have negative  
5 repercussions on the  $SD_{IR}$ .<sup>[24]</sup> Accordingly, enrollment will be discontinued if a participant is  
6  
7 unable to achieve the required time allotment for three consecutive weeks, or for a total of four  
8 weeks during either Phase One or Phase Two. If a participant is absent from the trial for a full  
9  
10 week (due to illness, vacation, family emergency, etc.), an additional week will be added at the  
11  
12 end of the trial for that participant. A maximum of three weeks throughout the totality of the trial  
13  
14 may be added for a single participant. Enrollment will also be discontinued if a participant  
15  
16 experiences any musculoskeletal injury or other medical event which prevents or limits safe  
17  
18 participation in exercise for three consecutive weeks, or if the participant receives medical advice  
19  
20 to stop participation.  
21  
22  
23  
24  
25  
26  
27

### 28 ***Data collection and management***

29  
30 Participant files will be de-identified, and each participant will be assigned a unique  
31  
32 identifier at the time of first contact with the research staff. All participants will meet with the  
33  
34 research staff for the sole purpose of data collection six times across three timepoints: twice at the  
35  
36 time of enrollment for baseline evaluation, twice between Phase One and Phase Two for mid-point  
37  
38 follow up and to allow for randomization, and twice following Phase Two for post-testing (Table  
39  
40 1). Additionally, participants' heart rate, chosen treadmill speed, and chosen treadmill slope will  
41  
42 be recorded in five-minute segments throughout the duration of every exercise training session.  
43  
44 All data will be collected in written form, and subsequently transferred to electronic files. Physical  
45  
46 versions of all files will be stored locally, in a secure room at the University of New Brunswick.  
47  
48 Digital files will be housed on a secure server operated by the University of New Brunswick.  
49  
50  
51  
52

### 53 ***Outcomes and instrumentation***

### *Primary outcome*

The primary outcome of the INTENSITY trial is HbA1c, analyzed using a DCA Vantage Analyzer (Siemens, Germany). To increase reliability HbA1c will be measured twice at each timepoint, separated by less than seven days, with the mean value used in all analyses. The potential influence of measurement error will be estimated by calculating the Typical Error (TE; see below).

### *Secondary outcomes*

At baseline research staff will record participant demographics, family history of cardiovascular and cardiometabolic disease, and current medication use. Participants will then complete the Physical Activity and Sedentary Behaviour Questionnaire to assess current physical activity and sedentary behaviours (Canadian Society for Exercise Physiology, 2013), and will be sent home with a Piezo Rx pedometer (StepsCount, Deep River, ON, Canada) to provide an objective indication of daily physical activity. Research staff will instruct each participant to wear the pedometer for seven consecutive days, excluding sleep time, and to remove the pedometer prior to any activity with the potential to submerge the device in water.

At each timepoint physiological and anthropometric measurements will occur over the span of two days, separated by less than one week. Participant height, systolic and diastolic blood pressure, and waist circumference will be measured by a member of the research team in accordance with Canadian Society for Exercise Physiology protocols.<sup>[25]</sup> Body mass, fat mass, and fat free mass will be estimated using the BODPOD (COSMED; Rome, Italy) following a 12-hour overnight fast. The BODPOD is a highly valid and reliable method for assessing body composition.<sup>[26,27]</sup> All cardiorespiratory fitness (VO<sub>2</sub>peak) evaluations will be supervised by TH, using a modified version of the Balke and Ware treadmill test.<sup>[28]</sup> Participants will walk at 3.4 miles

1  
2  
3 per hour (mph) at 0% grade on a treadmill (9500HR [Life Fitness, Illinois, USA]). After two  
4 minutes the grade will be increased to 5.0%, and progressively increase by 1.0% every minute  
5  
6 thereafter until 15.0% is achieved. If the participant is not fatigued, the grade will be maintained,  
7  
8 and the speed increased by 0.5 mph each minute until volitional fatigue. Gas exchange and heart  
9  
10 rate will be continuously gathered using a TrueOne 2400 Metabolic Cart (ParvoMedics, Salt Lake  
11  
12 City, UT, USA) and Polar FT1 heart rate monitor (Polar, Kempele, Finland), respectively.  
13  
14  $VO_{2peak}$  will be identified as the highest achieved 15-second average  $VO_2$ . Following the  
15  
16 treadmill test, participant METs and heart rate values will be reviewed by TH, and the heart rate  
17  
18 associated with an intensity of 4.5 or 6.0 METs (in line with the current exercise prescription) will  
19  
20 be identified. The identified heart rate value will be used to prescribe and monitor participant  
21  
22 intensity during subsequent training sessions, until cardiorespiratory fitness is re-evaluated. Should  
23  
24 the exact MET value not be observed during the test, the next closest value below the desired MET  
25  
26 value (i.e. 4.4 or 5.9 METS) will be used. The same research staff member (TH) will be present at  
27  
28 each assessment to reduce the potential for inter-rater differences to skew results.  
29  
30  
31  
32  
33  
34

### 35 *Cardiorespiratory fitness re-evaluation*

36  
37 Every four weeks throughout each Phase, a staff member will re-evaluate each participant  
38  
39 to ensure adaptations in cardiorespiratory fitness are accounted for. Replicating a typical exercise  
40  
41 session, participants will warm-up and workout while gas exchange and heart rate are recorded  
42  
43 using a TrueOne 2400 Metabolic Cart (Parvomedics, Salt Lake City, UT, USA) and Polar FT1  
44  
45 heart rate monitor (Polar, Kempele, Finland), respectively. The participant will remain in control  
46  
47 of the treadmill grade and speed and instructed to increase intensity as needed until the desired  
48  
49 MET value (4.5 or 6.0 METs) is achieved and maintained for a period of one minute, as observed  
50  
51 by the supervising staff member. Exercise accumulated during the re-evaluation will count towards  
52  
53  
54  
55  
56  
57  
58  
59  
60



1  
2  
3 the required weekly training time. The target heart rate identified during the fitness re-evaluation  
4 will be used for all subsequent training sessions, until the next re-evaluation is completed. The  
5 same research staff member (TH) will review the results of every re-evaluation to ensure  
6 consistency throughout the trial. A submaximal re-evaluation protocol was chosen in place of  
7 repeated administration of the maximal testing protocol to avoid the potential influence of repeated  
8 maximal tests on the outcomes, and to maximize participant comfort and compliance.  
9

### 10 11 12 13 14 15 16 17 *Exercise monitoring*

18  
19 To ensure participants are exercising at the appropriate intensity, research staff will monitor  
20 and record participant heart rate in five-minute intervals using the Polar Team2 (Polar, Kempele,  
21 Finland) heart rate monitoring system, treadmill speed and treadmill slope. The supervising  
22 research staff member will ensure each participant's heart rate throughout each training session  
23 remains within  $\pm 2.5\%$  of heart rate associated with the assigned MET value (as identified during  
24 the cardiorespiratory fitness test or subsequent re-evaluation).  
25  
26  
27  
28  
29  
30  
31

### 32 33 *Blinding*

34  
35 Participants and all research staff who assess, train, or otherwise interact with participants  
36 will be blinded to all follow-up measures of HbA1c, as well as the participant responder  
37 categorization. To maintain blinding, research staff who do not normally interact with participants  
38 will be responsible for the collection and recording of HbA1c results, determining individual  
39 participant responder status, and completing the randomization process. Group allocation for Phase  
40 Two will then be told to TH, who will disseminate the required training protocol to other research  
41 staff and participants.  
42  
43  
44  
45  
46  
47  
48  
49  
50

### 51 *Randomization*

1  
2  
3 Randomization of intervention participants will occur after the follow-up assessment prior  
4 to Phase Two. Randomization will occur in blocks of five based on participant response status  
5 (responder vs. non-responder and uncertain responder), using a random number generator. The  
6 Phase Two arm will be communicated to TH by member of the Cardiometabolic Exercise &  
7 Lifestyle Laboratory staff not related to the project.  
8  
9

### 10 ***Statistical analysis***

11  
12 The sample size calculation was based on the anticipated change in the primary outcome  
13 measure, HbA1c, following Phase One of the trial. A meta-analysis conducted by Umpierre et al.,  
14 (2011)<sup>[29]</sup> indicates supervised aerobic exercise training of 12 weeks or longer is associated with a  
15 0.73% reduction in HbA1c, which is anticipated here. Given a desired power of 80% and alpha of  
16 0.05, a generalized linear model with a linear auto-regression structure (to account for the duplicate  
17 measures of HbA1c) was used to calculate the necessary sample size. A sample of 42 participants  
18 was identified to detect significant changes in HbA1c. Provided an anticipated 20% drop-out rate,  
19 50 participants will be recruited to participate in the intervention group. An additional 10  
20 participants will be recruited for allocation to the time-matched control group.  
21  
22  
23  
24  
25  
26  
27  
28  
29  
30  
31  
32  
33  
34  
35  
36

37  
38 *Objective 1: Identify the number of exercise non-responders, based on the observed*  
39 *changes in HbA1c, across individuals living with prediabetes or T2DM following 16 weeks of*  
40 *continuous aerobic exercise training.* Individuals will be categorized as responders if the observed  
41 change can confidently be assumed to be beyond the MCID, while accounting for the variation-  
42 induced changes experienced by the time-matched control group. Accordingly, individual 90%  
43 confidence intervals (CI) for each participant will be calculated using the equation outlined by  
44 Swinton et al. (2018)<sup>[19]</sup>:  
45  
46  
47  
48  
49  
50  
51  
52

$$53 \text{ Individual CI} = (\text{Observed score}_{\text{MID}} - \text{Observed score}_{\text{BASELINE}}) \pm (\text{CI multiplier} \times \text{SD}_{\text{CON}}).$$

54  
55  
56  
57  
58  
59  
60

1  
2  
3 Here, the  $SD_{CON}$  allows for potential variation introduced in the absence of the intervention to be  
4 considered when constructing each CI. As the sample size of the control group may influence the  
5 certainty of the CI, the CI multiplier will be adjusted for a control sample size of 10 individuals  
6 (CI multiplier = 1.83)<sup>[19]</sup>. The individual CIs will be evaluated against a threshold of clinical  
7 relevance. In line with the Federal Drug Agency and the European Medicines Agency, an MCID  
8 of 0.3% for HbA1c will be used.<sup>[30,31]</sup> Participants whose lower bound of the 90% CI lays above  
9 the MCID threshold will be categorized as responders. Participants whose upper bound of the 90%  
10 CI lays below the MCID will be categorized as non-responders. Participants whose 90% CI  
11 partially crosses the MCID will be categorized as uncertain. For randomization, participants  
12 categorized as uncertain will be grouped with non-responders.

13  
14  
15  
16  
17  
18  
19  
20  
21  
22  
23  
24  
25  
26 *Objective 2: Explore if increasing the intensity and/or increasing the duration of exercise*  
27 *training will 'rescue' previously identified non-responders by garnering improvements in HbA1c.*  
28  
29 Following the completion of Phase Two, the categorization procedure conducted during Objective  
30 2 will be repeated for all previously identified uncertain and non-responders, with important  
31 adjustments made to the CI equation. The  $SD_{CON}$  will be re-calculated with the standard deviation  
32 of the pre-post difference scores from the control group using HbA1c measurements taken at  
33 midpoint and follow-up post testing. This will allow for the CIs to represent the potential the  
34 variation-induced changes experienced by the time-matched control group across the second, 12-  
35 week period for Objective 3.

36  
37  
38  
39  
40  
41  
42  
43  
44  
45  
46  
47 Accordingly, the individual 90% CIs will be calculated using the equation outlined by  
48 Swinton et al. (2018):

$$49 \text{ Individual CI} = (\text{Observed score}_{POST} - \text{Observed score}_{MID}) \pm (\text{CI multiplier} \times [SD_{CON}]).$$

50  
51  
52  
53  
54  
55  
56  
57  
58  
59  
60

1  
2  
3 Individual CIs will again be evaluated against the MCID response threshold of 0.3%, and  
4 participants re-categorized as previously described. The raw number of participants who were  
5 previously categorized as a non-responder or uncertain responder that are categorized as  
6 responders after completing Phase Two will be reported.  
7  
8  
9  
10  
11

### 12 **Ethics and dissemination**

13  
14 All experimental procedures have been approved by the Research Ethics Board at the  
15 University of New Brunswick (REB: 2018-168). Any substantial protocol amendments will be  
16 sent to the Research Ethics Board for review and approval prior to implementation.  
17  
18  
19  
20

### 21 ***Informed Consent***

22  
23 At the time of first contact with a member of the research staff, interested individuals will  
24 be provided with information about the study and have their eligibility confirmed. Eligible  
25 individuals will be provided with a digital copy of the consent form prior to the first meeting. At  
26 the initial meeting, all eligible individuals will be provided with adequate time to review a physical  
27 copy of the consent form, ask any questions, and consider their participation. If the individual  
28 decides to become a participant, they will be asked to provide written consent, which will be  
29 countersigned by the research staff. All participants are free to withdraw from the study at any  
30 time.  
31  
32  
33  
34  
35  
36  
37  
38  
39  
40  
41

### 42 **Dissemination**

43  
44 Results will be presented at scientific meetings and submitted to peer-reviewed journals.  
45 All publications and presentations related to the study will be authorized and reviewed by all  
46 investigators. Findings from this study will be used to develop and provide support for future  
47 randomized control trials. All study participants will have the option at the time of consent to  
48  
49  
50  
51  
52  
53  
54  
55  
56  
57  
58  
59  
60

1  
2  
3 request a copy of the study findings at the time of completion. A summary of the findings will be  
4  
5 provided to all participants who indicate a desire to receive it.  
6

7  
8 **Trial status**  
9

10 The study is currently recruiting and enrolling participants. The first participant was  
11  
12 recruited in May 2019, and recruitment is expected to be complete in November 2020. The  
13  
14 expected completion date of the project, including all follow-up appointments, is June 2021.  
15  
16  
17  
18  
19  
20  
21  
22  
23  
24  
25  
26  
27  
28  
29  
30  
31  
32  
33  
34  
35  
36  
37  
38  
39  
40  
41  
42  
43  
44  
45  
46  
47  
48  
49  
50  
51  
52  
53  
54  
55  
56  
57  
58  
59  
60

### **Contributor Statement**

Dr. Martin Sénéchal is the primary investigator. Dr. Danielle Bouchard, Dr. Brendon Gurd and Travis Hrubeniuk contributed to the study design and analysis methods. Travis Hrubeniuk will coordinate study implementation and data collection. All authors contributed to the completion and approved the final version of this manuscript. The study sponsor had no input to the design, implementation, interpretation, or any decision making of this study. The authors would also like to thank the patient advisers who contributed to the study.

### **Competing Interests**

The authors have no competing interests to report.

### **Funding**

This work is supported by grants from The Heart and Stroke Foundation New Brunswick and New Brunswick Health Research Foundation (NBHRF). TH salary was supported by a combined NBHRF and Maritime SPOR Support Unit studentship.

### **Data Sharing Statement**

No data are available for sharing.

## References

- 1 Tremblay MS, Warburton DER, Janssen I, *et al.* New Canadian Physical Activity Guidelines. *Appl Physiol Nutr Metab* 2011;**36**:36–46. doi:10.1139/H11-009
- 2 Piercy KL, Troiano RP, Ballard RM, *et al.* The Physical Activity Guidelines for Americans. *JAMA* 2018;**320**:2020–8. doi:10.1001/jama.2018.14854
- 3 Diabetes Canada Clinical Practice Guidelines Expert Committee. Diabetes Canada 2018 Clinical Practice Guidelines for the Prevention and Management of Diabetes in Canada. *Can J Diabetes* 2018;:S1–325.
- 4 World Health Organization. Global Recommendations on Physical Activity for Health. *WHO Press* 2010.
- 5 Brown WJ, Bauman AE, Bull F, *et al.* Development of Evidence-based Physical Activity Recommendations for Adults (18-64 years). Australia: : Commonwealth of Australia 2013.
- 6 Alvarez C, Ramírez-Campillo R, Ramírez-Vélez R, *et al.* Effects of 6-Weeks High-Intensity Interval Training in Schoolchildren with Insulin Resistance: Influence of Biological Maturation on Metabolic, Body Composition, Cardiovascular and Performance Non-responses. *Front Physiol* 2017;**8**. doi:10.3389/fphys.2017.00444
- 7 Gurd BJ, Giles MD, Bonafiglia JT, *et al.* Incidence of nonresponse and individual patterns of response following sprint interval training. *Appl Physiol Nutr Metab* 2015;**41**:229–34. doi:10.1139/apnm-2015-0449
- 8 Ross R, de Lannoy L, Stotz PJ. Separate Effects of Intensity and Amount of Exercise on Interindividual Cardiorespiratory Fitness Response. *Mayo Clinic Proceedings* 2015;**90**:1506–14. doi:10.1016/j.mayocp.2015.07.024
- 9 Bouchard C, Blair SN, Church TS, *et al.* Adverse Metabolic Response to Regular Exercise: Is It a Rare or Common Occurrence? *PLOS ONE* 2012;**7**:e37887. doi:10.1371/journal.pone.0037887
- 10 Hecksteden A, Pitsch W, Rosenberger F, *et al.* Repeated testing for the assessment of individual response to exercise training. *Journal of Applied Physiology* Published Online First: 11 January 2018. doi:10.1152/jappphysiol.00896.2017
- 11 Phillips BE, Kelly BM, Lilja M, *et al.* A Practical and Time-Efficient High-Intensity Interval Training Program Modifies Cardio-Metabolic Risk Factors in Adults with Risk Factors for Type II Diabetes. *Front Endocrinol* 2017;**8**. doi:10.3389/fendo.2017.00229
- 12 Montero D, Lundby C. Refuting the myth of non-response to exercise training: ‘non-responders’ do respond to higher dose of training. *J Physiol* 2017;**595**:3377–87. doi:10.1113/JP273480

- 1  
2  
3 13 Lannoy L de, Clarke J, Stotz PJ, *et al.* Effects of intensity and amount of exercise on measures  
4 of insulin and glucose: Analysis of inter-individual variability. *PLOS ONE* 2017;**12**:e0177095.  
5 doi:10.1371/journal.pone.0177095  
6
- 7  
8 14 Leifer ES, Mikus CR, Karavirta L, *et al.* Adverse Cardiovascular Response to Aerobic  
9 Exercise Training: Is This a Concern? *Medicine & Science in Sports & Exercise* 2016;**48**:20–  
10 5. doi:10.1249/MSS.0000000000000752  
11
- 12 15 Sénéchal M, Rempel M, Duhamel TA, *et al.* Fitness is a determinant of the metabolic response  
13 to endurance training in adolescents at risk of type 2 diabetes mellitus. *Obesity* 2015;**23**:823–  
14 32. doi:10.1002/oby.21032  
15
- 16 16 Hecksteden A, Kraushaar J, Scharhag-Rosenberger F, *et al.* Individual response to exercise  
17 training - a statistical perspective. *Journal of Applied Physiology* 2015;**118**:1450–9.  
18 doi:10.1152/jappphysiol.00714.2014  
19
- 20 17 Hopkins WG. Measures of Reliability in Sports Medicine and Science. *Sports Med* 2000;**30**:1–  
21 15. doi:10.2165/00007256-200030010-00001  
22
- 23 18 Hopkins WG. Individual responses made easy. *Journal of Applied Physiology* 2015;**118**:1444–  
24 6. doi:10.1152/jappphysiol.00098.2015  
25
- 26 19 Swinton PA, Hemingway BS, Saunders B, *et al.* A Statistical Framework to Interpret  
27 Individual Response to Intervention: Paving the Way for Personalized Nutrition and Exercise  
28 Prescription. *Front Nutr* 2018;**5**. doi:10.3389/fnut.2018.00041  
29
- 30 20 Ross R, Goodpaster BH, Koch LG, *et al.* Precision exercise medicine: understanding exercise  
31 response variability. *Br J Sports Med* Published Online First: 12 March 2019.  
32 doi:10.1136/bjsports-2018-100328  
33
- 34 21 Walsh JJ, Bonafiglia JT, Goldfield GS, *et al.* Interindividual variability and individual  
35 responses to exercise training in adolescents with obesity. *Appl Physiol Nutr Metab*  
36 2019;**45**:45–54. doi:10.1139/apnm-2019-0088  
37
- 38 22 Marsh CE, Thomas HJ, Naylor LH, *et al.* Fitness and strength responses to distinct exercise  
39 modes in twins: Studies of Twin Responses to Understand Exercise as a Therapy (STRUETH)  
40 study. *The Journal of Physiology* 2020;**n/a**. doi:10.1113/JP280048  
41
- 42 23 Gupta N. Charting the Progression of Diabetes Mellitus in New Brunswick: Rates, Correlates,  
43 and Implications for Accountability in Public Policy. *I* Published Online First: 23 November  
44 2017. <https://journals.lib.unb.ca/index.php/JNBS/article/view/25880> (accessed 25 Jul 2019).  
45
- 46 24 Bonafiglia JT, Brennan AM, Ross R, *et al.* An appraisal of the SDIR as an estimate of true  
47 individual differences in training responsiveness in parallel-arm exercise randomized  
48 controlled trials. *Physiological Reports* 2019;**7**:e14163. doi:10.14814/phy2.14163  
49
- 50  
51  
52  
53  
54  
55  
56  
57  
58  
59



- 1  
2  
3 25 Canadian Society for Exercise Physiology. *Canadian Society for Exercise Physiology -*  
4 *Physical Activity Training for Health (CSEP-PATH)*. Canadian Society for Exercise  
5 Physiology 2013.  
6  
7  
8 26 Bailey BW, Tucker LA, Peterson TR, *et al*. Test-retest reliability of body fat percentage results  
9 using dual energy x-ray absorptiometry and the BOD POD. *Medicine & Science in Sports &*  
10 *Exercise* 2001;**33**:S174.  
11  
12 27 Vescovi JD, Zimmerman SL, Miller WC, *et al*. Evaluation of the BOD POD for estimating  
13 percentage body fat in a heterogeneous group of adult humans. *Eur J Appl Physiol*  
14 2001;**85**:326–32. doi:10.1007/s004210100459  
15  
16 28 Balke B, Ware RW. The present status of physical fitness in the air force. *US Armed Forces*  
17 *Med J* 1959;**10**:675–88.  
18  
19 29 Umpierre D, Ribeiro PAB, Kramer CK, *et al*. Physical Activity Advice Only or Structured  
20 Exercise Training and Association With HbA1c Levels in Type 2 Diabetes: A Systematic  
21 Review and Meta-analysis. *JAMA* 2011;**305**:1790–9. doi:10.1001/jama.2011.576  
22  
23 30 Center for Drug Evaluation and Research. Guidance for industry diabetes mellitus: devleoping  
24 drugs and therapeutic biologics for treatment and prevention. 2008.  
25  
26  
27 31 Committee for Medicinal Products for Human Use. Guideline on clinical investigation of  
28 medicinal products in the treatment or prevention of diabetes mellitus. 2012.  
29  
30  
31  
32  
33  
34  
35  
36  
37  
38  
39  
40  
41  
42  
43  
44  
45  
46  
47  
48  
49  
50  
51  
52  
53  
54  
55  
56  
57  
58  
59  
60

Table 1. Measurement timeline



|                                         | <b>Weeks</b> |          |                                                                                                                                   |  |  |  |                      |          |                                                                                                                                   |  |           |          |   |  |  |   |   |
|-----------------------------------------|--------------|----------|-----------------------------------------------------------------------------------------------------------------------------------|--|--|--|----------------------|----------|-----------------------------------------------------------------------------------------------------------------------------------|--|-----------|----------|---|--|--|---|---|
|                                         | <b>1</b>     |          | <b>2 – 17</b>                                                                                                                     |  |  |  | <b>18</b>            |          | <b>19 – 31</b>                                                                                                                    |  | <b>32</b> |          |   |  |  |   |   |
| <b>Visit</b>                            | <b>1</b>     | <b>2</b> | <b>Phase One</b>                                                                                                                  |  |  |  | <b>3</b>             | <b>4</b> | <b>Phase Two</b>                                                                                                                  |  | <b>5</b>  | <b>6</b> |   |  |  |   |   |
| Demographics & Family History           | X            |          | <b>16 weeks exercise training</b><br>(Approximately 3-5 visits per week)<br><b>Submaximal fitness re-evaluation every 4 weeks</b> |  |  |  | <b>Randomization</b> |          | <b>12 weeks exercise training</b><br>(Approximately 3-5 visits per week)<br><b>Submaximal fitness re-evaluation every 4 weeks</b> |  |           |          |   |  |  |   |   |
| Medication Use                          | X            |          |                                                                                                                                   |  |  |  |                      |          |                                                                                                                                   |  |           |          |   |  |  | X |   |
| Anthropometrics & Blood Pressure        | X            |          |                                                                                                                                   |  |  |  |                      |          |                                                                                                                                   |  |           | X        |   |  |  | X |   |
| Glycemic Control                        | X            | X        |                                                                                                                                   |  |  |  |                      |          |                                                                                                                                   |  |           | X        | X |  |  | X | X |
| Cardiorespiratory Fitness               | X            |          |                                                                                                                                   |  |  |  |                      |          |                                                                                                                                   |  |           | X        |   |  |  | X |   |
| Physical Activity & Sedentary Behaviour | X            |          |                                                                                                                                   |  |  |  |                      |          |                                                                                                                                   |  |           |          |   |  |  | X |   |

1  
2  
3  
4  
5  
6  
7  
8  
9  
10  
11  
12  
13  
14  
15  
16  
17  
18  
19  
20  
21  
22  
23  
24  
25  
26  
27  
28  
29  
30  
31  
32  
33  
34  
35  
36  
37  
38  
39  
40  
41  
42  
43  
44  
45  
46  
47  
48  
49  
50  
51  
52  
53  
54  
55  
56  
57  
58  
59  
60

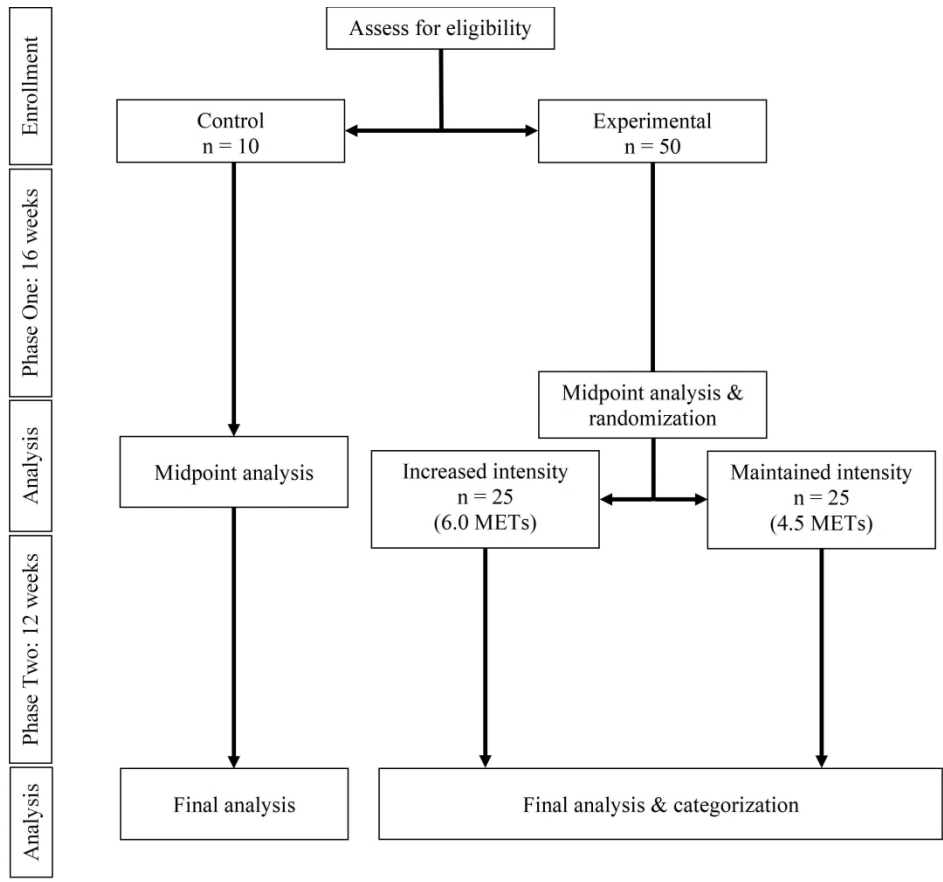

Figure 1. Participant flowchart (METs, metabolic equivalent tasks).

302x268mm (300 x 300 DPI)

# BMJ Open

**Can non-responders be 'rescued' by increasing exercise intensity? A quasi-experimental trial of individual responses among humans living with prediabetes or type 2 diabetes mellitus in Canada.**

|                                 |                                                                                                                                                                                                                                                                                                                                                                                                                                                                                                                                                       |
|---------------------------------|-------------------------------------------------------------------------------------------------------------------------------------------------------------------------------------------------------------------------------------------------------------------------------------------------------------------------------------------------------------------------------------------------------------------------------------------------------------------------------------------------------------------------------------------------------|
| Journal:                        | <i>BMJ Open</i>                                                                                                                                                                                                                                                                                                                                                                                                                                                                                                                                       |
| Manuscript ID                   | bmjopen-2020-044478.R1                                                                                                                                                                                                                                                                                                                                                                                                                                                                                                                                |
| Article Type:                   | Protocol                                                                                                                                                                                                                                                                                                                                                                                                                                                                                                                                              |
| Date Submitted by the Author:   | 17-Feb-2021                                                                                                                                                                                                                                                                                                                                                                                                                                                                                                                                           |
| Complete List of Authors:       | Hrubeniuk, Travis; University of New Brunswick, Interdisciplinary Studies; University of New Brunswick, Cardiometabolic Exercise and Lifestyle Laboratory<br>Bouchard, Danielle; University of New Brunswick, Faculty of Kinesiology; University of New Brunswick, Cardiometabolic Exercise and Lifestyle Laboratory<br>Gurd, Brendon; Queen's University, School of Kinesiology and Health Studies<br>Senechal, Martin; University of New Brunswick, Faculty of Kinesiology; University of New Brunswick, Cardiometabolic Exercise and Lifestyle Lab |
| <b>Primary Subject Heading</b>: | Sports and exercise medicine                                                                                                                                                                                                                                                                                                                                                                                                                                                                                                                          |
| Secondary Subject Heading:      | Diabetes and endocrinology                                                                                                                                                                                                                                                                                                                                                                                                                                                                                                                            |
| Keywords:                       | DIABETES & ENDOCRINOLOGY, SPORTS MEDICINE, General diabetes < DIABETES & ENDOCRINOLOGY                                                                                                                                                                                                                                                                                                                                                                                                                                                                |
|                                 |                                                                                                                                                                                                                                                                                                                                                                                                                                                                                                                                                       |

SCHOLARONE™  
Manuscripts



I, the Submitting Author has the right to grant and does grant on behalf of all authors of the Work (as defined in the below author licence), an exclusive licence and/or a non-exclusive licence for contributions from authors who are: i) UK Crown employees; ii) where BMJ has agreed a CC-BY licence shall apply, and/or iii) in accordance with the terms applicable for US Federal Government officers or employees acting as part of their official duties; on a worldwide, perpetual, irrevocable, royalty-free basis to BMJ Publishing Group Ltd ("BMJ") its licensees and where the relevant Journal is co-owned by BMJ to the co-owners of the Journal, to publish the Work in this journal and any other BMJ products and to exploit all rights, as set out in our [licence](#).

The Submitting Author accepts and understands that any supply made under these terms is made by BMJ to the Submitting Author unless you are acting as an employee on behalf of your employer or a postgraduate student of an affiliated institution which is paying any applicable article publishing charge ("APC") for Open Access articles. Where the Submitting Author wishes to make the Work available on an Open Access basis (and intends to pay the relevant APC), the terms of reuse of such Open Access shall be governed by a Creative Commons licence – details of these licences and which [Creative Commons](#) licence will apply to this Work are set out in our licence referred to above.

Other than as permitted in any relevant BMJ Author's Self Archiving Policies, I confirm this Work has not been accepted for publication elsewhere, is not being considered for publication elsewhere and does not duplicate material already published. I confirm all authors consent to publication of this Work and authorise the granting of this licence.

1  
2  
3 Can non-responders be ‘rescued’ by increasing exercise intensity? A quasi-experimental trial of  
4 individual responses among humans living with prediabetes or type 2 diabetes mellitus in  
5  
6  
7  
8 Canada.  
9

10  
11  
12 Travis J. Hrubeniuk,<sup>1,2</sup> Danielle R. Bouchard,<sup>2,3</sup> Brendon J. Gurd,<sup>4</sup> Martin Sénéchal<sup>2,3</sup>

13  
14  
15 <sup>1</sup>Interdisciplinary Studies, School of Graduate Studies, University of New Brunswick

16  
17 <sup>2</sup>Cardiometabolic Exercise and Lifestyle Laboratory, University of New Brunswick

18  
19 <sup>3</sup>Faculty of Kinesiology, University of New Brunswick

20  
21 <sup>4</sup>School of Kinesiology and Health Studies, Queen’s University  
22  
23  
24  
25

## 26 **Corresponding Author**

27  
28 Dr. Martin Sénéchal, PhD, CSEP-CEP

29  
30 Associate Professor, Faculty of Kinesiology, University of New Brunswick

31  
32 90 Mackay Drive, Room 319

33  
34 Fredericton, New Brunswick,

35  
36 Canada, E3B 5A3

37  
38 Phone: (506) 451-6889

39  
40 Email: msenecha@unb.ca  
41  
42  
43  
44  
45  
46  
47  
48  
49  
50  
51  
52  
53  
54  
55  
56  
57  
58  
59  
60

**Trial Registration**

This trial has been registered on ClinicalTrials.gov (NCT03787836)

**Study Protocol**

Version 3.0, dated May 8<sup>th</sup>, 2019

**Study Sponsors**

Sponsor: New Brunswick Health Research Foundation

Address: 10 Knowledge Park Dr. Suite 100, Fredericton NB, Canada, E3C 2M7.

Email: info@nbhrf.com

Phone Number: (506) 455-8886

Sponsor: The Heart and Stroke Foundation New Brunswick

Address: 580 Main St b210, Saint John, NB E2K 1J5

Email: ksisk@hsf.nb.ca

Phone Number: 506-634-1620

## Abstract

**Introduction:** Exercise is recommended to improve glycemic control. Yet, individual changes in glycemic control following exercise can vary greatly, meaning while some significantly improve others, coined ‘non-responders’, do not. Increasing the intensity of exercise may ‘rescue’ non-responders and help generate a response to training. This trial will identify non-responders to changes in glycated hemoglobin (HbA1c) across inactive individuals living with prediabetes or type 2 diabetes mellitus (T2DM) following an aerobic exercise program and evaluate if increasing training intensity will elicit beneficial changes to ‘rescue’ previously categorized non-responders.

**Methods and analysis:** This study will recruit 60 participants for a two-phase aerobic exercise training program. Participants will be allocated to a control group or assigned to an intervention group. Control participants will maintain their current lifestyle habits. During Phase One, intervention participants will complete 16 weeks of aerobic exercise at an intensity of 4.5 metabolic equivalents (METs) for 150 minutes per week. Participants will then be categorized as responders or non-responders based on the change in HbA1c. For Phase Two, participants will be blocked based on responder status and randomly allocated to a maintained intensity, or increased intensity group for 12 weeks. The maintained group will continue to train at 4.5 METs, while the increased intensity group will train at 6.0 METs for 150 minutes per week.

**Ethics and dissemination:** Results will be presented at scientific meetings and submitted to peer-reviewed journals. Publications and presentations related to the study will be authorized and reviewed by all investigators. Findings from this study will be used to provide support for future randomized control trials. All experimental procedures have been approved by the Research Ethics Board at the University of New Brunswick (REB: 2018-168).

**Trial registration:** This trial has been registered on ClinicalTrials.gov (NCT03787836).



## Article Summary

### *Strengths and Limitations*

- Participants will be allocated, not randomized, to control and intervention groups for Phase One, as data from the control group is required to estimate variance and allow for the accurate categorization of intervention participants prior to subsequent randomization to exercise intensity branches in Phase Two.
- In line with recommendations from numerous governing bodies and policy makers, the physical activity intervention will have participants complete 150 minutes of aerobic physical activity per week.
- Multiple measurements of the primary outcome are taken at each timepoint to increase reliability.
- An absolute measure of exercise intensity will be prescribed to equalize energy expenditure across all participants.

## Introduction

Organizations around the globe provide standardized exercise recommendations to reduce the onset of chronic disease and premature mortality.<sup>[1-5]</sup> However, observed changes following a typical exercise program are often heterogenous. This heterogeneity can result in individuals not experiencing the desired benefits of standard exercise training, and being labelled as ‘exercise non-responders’. Attempts to quantify the observed heterogeneity, known as interindividual variation, and/or estimate the prevalence of non-responders have recently proliferated.<sup>[6-15]</sup>

Research designed to identify non-responders has primarily focused on cardiorespiratory fitness in apparently healthy adults. Moreover, attempts to categorize youth<sup>[6,15]</sup> and adult<sup>[9,11,13,14]</sup> participants as responders or non-responders based on cardiometabolic outcomes have not often included a time-matched control group in their analysis. Opting to use single-group study designs or reliability data to set response thresholds and categorize participants, produces response rates which reflect the number of participants who improved beyond an estimate of random or measurement error<sup>[10,16,17]</sup>. Alternatively, including a time-matched control group allows an estimate of within-subject variation to be considered when setting a response threshold or calculating individual confidence intervals, encapsulating additional variance and accounting for its impact when making categorizations.<sup>[10,18,19]</sup>

Labeling individuals who do not experience the intended benefits following an exercise program as non-responders can be problematic for several reasons, including the substantial influence a subjectively chosen threshold has on response categorizations, the high likelihood that a non-responder experienced a beneficial change in a secondary outcome, and the specificity of a response categorization to the provided intervention.<sup>[10,11,20,21]</sup> Accordingly, adapting exercise protocols for individuals initially categorized as non-responders may garner beneficial changes in

1  
2  
3 the primary outcome, and thereby ‘rescue’, those individuals from their non-responder status.<sup>[22]</sup>  
4  
5  
6 Montero and Lundby (2017) highlighted the potential effectiveness of such efforts, using a 120-  
7  
8 minute increase in weekly exercise volume to rescue a group of 21 apparently healthy, young adult,  
9  
10 male non-responders from their original categorization.<sup>[12]</sup> Less is known, however, about the  
11  
12 ability of adapting exercise training intensity to rescue non-responders. One study from Ross et  
13  
14 al., (2015) allocated 121 sedentary adults living with obesity to one of three groups for 24 weeks  
15  
16 of exercise training: (1) low-volume, low-intensity; (2) high-volume, low-intensity; or (3) high-  
17  
18 volume, high-intensity.<sup>[8]</sup> The authors found doubling the training volume (group 1 vs. 2) led to a  
19  
20 50% decrease in non-response, whereas increasing the intensity and volume (group 3) only  
21  
22 produced responders. While these findings suggest an increase in exercise intensity can increase  
23  
24 the overall proportion of responders, it remains unknown if this would translate to specific  
25  
26 improvements in those previously categorized as non-responders. Moreover, no such work has  
27  
28 been conducted with those living with prediabetes or T2DM or using an indicator of glycemic  
29  
30 control as the primary outcome.  
31  
32  
33

34  
35 The INTENSITY study is a two-phase, quasi-experimental trial. The objectives are to:

- 36  
37 1. Identify the number of exercise non-responders, based on the observed changes in HbA1c,  
38  
39 across individuals living with prediabetes or T2DM following 16 weeks of continuous  
40  
41 aerobic exercise training.  
42  
43
- 44  
45 2. Explore if increasing the intensity and/or increasing the duration of exercise training by 12  
46  
47 weeks will ‘rescue’ previously identified non-responders by garnering improvements in  
48  
49 HbA1c.  
50

51 For the purpose of this analysis, an exercise responder will be defined as any individual who has  
52  
53 experienced a decrease in HbA1c beyond the minimal clinically important difference (MCID)  
54  
55  
56  
57  
58  
59

1  
2  
3 following participation in the provided exercise trail, while accounting for the variation-induced  
4 changes in HbA1c experienced by the time-matched control group. We hypothesize that a  
5 significant proportion of participants will be categorized as non-responders following participation  
6 in the exercise program, and increasing the intensity of exercise training will rescue the previously  
7 identified non-responders by producing beneficial changes in HbA1c.  
8  
9  
10  
11  
12  
13

## 14 **Methods and analysis**

### 15 *Study setting*

16  
17  
18  
19 The INTENSITY trial will be conducted at the University of New Brunswick in  
20 Fredericton, New Brunswick, Canada. This location was chosen due to the available equipment,  
21 ease of access for participants, availability of a private exercise facility for the delivery of the  
22 training protocol, and the relatively high rates of T2DM throughout the province.<sup>[23]</sup>  
23  
24  
25  
26  
27

### 28 *Eligibility criteria*

29  
30  
31 Inclusion criteria:

- 32  
33 1. Community-dwelling adults aged 19 years or older.
- 34  
35 2. Currently living with prediabetes or T2DM as diagnosed by a physician and confirmed by  
36  
37 an HbA1c value of 5.7% or above, as verified by duplicate testing.
- 38  
39 3. Not currently partaking in a self-reported regular physical activity regimen, defined as  
40  
41 consistent participation in running or jogging activity, attending physical activity or  
42  
43 exercise classes on a weekly basis, or averaging 10,000 steps per day or more over the  
44  
45 course of 7 days.  
46  
47  
48

49  
50 Exclusion criteria:

- 51  
52 1. Self-reported diagnosis of low iron concentrations, anemia, or being treated for these  
53  
54 conditions.  
55  
56  
57  
58  
59  
60

- 2.
3. Diagnosed with any red blood cell altering condition.
- 4.
5. Currently living with any cardiovascular disease which would impact the ability to safely
6. participate in exercise training.
- 7.
- 8.
- 9.
10. 4. Currently prescribed any medication which would impact the ability to use a heart rate
11. monitor to accurately track exercise intensity.
- 12.
- 13.

### ***Recruitment***

Participants will be recruited from the city of Fredericton, New Brunswick, Canada, and the surrounding area using advertisements placed in participating grocery stores, pharmacies, health care centers, physician offices, and on social media. The research team will also use internal newsletters and electronic communication platforms to inform staff and students at the University of New Brunswick and St. Thomas University of the study. Partnerships with the local branches of Diabetes Canada and government-funded diabetes education and support programs will allow for research staff to attend meetings and distribute advertisements to clients.

### ***Patient and Public Involvement***

Prior to designing the study, 65 patients living with T2DM in Fredericton, New Brunswick and the surrounding area who previously engaged in an exercise-based lifestyle intervention program were consulted by the research team to help ensure relevance of the research purpose to this population, and provide effective dissemination input. As a results, findings will be provided to study participants on an individual basis via their requested means of communication, and the research team will host a public event to discuss the findings, what they mean, and how they may be implemented by interested stakeholders.

### ***Interventions***

Participation in the INTENSITY trial will take place across two distinct phases (Figure 1).

### *Phase One*

Eligible participants will be assigned to one of a control or intervention group. Allocation will be based on the time of recruitment, with the first participants assigned to the control condition until group capacity is reached. All subsequent participants will be assigned to the intervention. Allocation was chosen in favour of randomization during Phase One, as data from the control group is required to estimate measurement variance and allow for the accurate categorization of intervention participants prior to randomization in Phase Two.

Participants allocated to the control group will receive no exercise advice or instruction. Control participants will be instructed to maintain current lifestyle habits, contacted monthly to ensure continued enrollment and answer pertinent questions, and asked to return for mid-point testing in 16 weeks. Participants allocated to the intervention group will be scheduled to begin the first phase of the training protocol within one week of completing all baseline testing. The Phase One training protocol will last for 16 weeks, requiring participants to exercise at an intensity of 4.5 metabolic equivalents (METs) on a treadmill. An absolute measure of intensity was chosen in favour of a relative measure of intensity to equalize energy expenditure across all participants. All exercise will be supervised by research staff and take place in a private exercise facility located on the University of New Brunswick campus. To maximize attendance exercise sessions will be scheduled on a weekly basis. Participants will be eased into the program using a four-week progression, completing 80 minutes of exercise in week one, 100 minutes in week two, 120 minutes in week three, and 135 minutes in week four. For each of the remaining twelve weeks participants will complete 150 minutes of exercise. Each participant will choose the number of weekly sessions needed to complete the required time, as long as the total number of sessions is greater than one. Participants will be allowed to choose the speed and grade of the treadmill during

1  
2  
3 the exercise time, as long as the prescribed intensity is achieved and maintained for the duration  
4 of each session. The supervising research staff will instruct participants to increase or decrease  
5 exercise intensity by increasing or decreasing the speed and/or grade of the treadmill, as necessary.  
6  
7

8  
9  
10 At the start of every training session participants will be given five minutes to warmup and achieve  
11 the targeted intensity. Warmup time during each session will not count towards the total exercise  
12 time for the week. To account for improvements in cardiorespiratory fitness and ensure  
13 participants train at the appropriate intensity, each participant will be re-evaluated every four  
14 weeks.  
15  
16  
17  
18  
19  
20

### 21 *Categorization of Exercise Responders and Non-Responders*

22  
23  
24 Based on the observed changes in HbA1c following the 16 weeks of exercise training, each  
25 participant in the intervention group will be categorized as a responder, non-responder, or  
26 uncertain responder. Individual 90% confidence intervals (CI) around the observed change in  
27 HbA1c will be calculated for each participant, with participants whose lower bound of the 90% CI  
28 lays above the selected response threshold categorized as responders, and those whose upper  
29 bound of the 90% CI lays below the response threshold categorized as non-responders. As the CI  
30 for some participants may cross the threshold for response, it may not be possible to confidently  
31 categorize all participants as either a responder or non-responder. Therefore, those participants  
32 whose 90% CI partially crosses the response threshold will be categorized as uncertain responders.  
33  
34  
35  
36  
37  
38  
39  
40  
41  
42  
43  
44  
45 For the purpose of randomization in Phase Two, participants categorized as uncertain will be  
46 grouped with non-responders.  
47  
48

### 49 *Phase Two*

50  
51  
52 Participants in the control group will again be instructed to maintain their current lifestyle  
53 habits, contacted monthly to answer any pertinent questions, and asked to return for follow-up  
54  
55  
56  
57  
58  
59  
60

1  
2  
3 testing in 12 weeks. Participants in the intervention group will be blocked based on their responder  
4 status and randomly allocated to either a maintained exercise group, or an increased intensity  
5 group. Participants in the maintained exercise group will continue the supervised, treadmill-based  
6 aerobic exercise training for 150 minutes per week at an intensity of 4.5 METs, for 12 weeks.  
7  
8 Participants in the increased intensity group will increase the intensity of their supervised,  
9 treadmill-based aerobic exercise to 6.0 METs, for 150 minutes per week. Participant scheduling,  
10 freedom to choose treadmill speed and slope, and supervision will follow the same methods as  
11 applied during Phase One. Likewise, cardiorespiratory fitness will be re-evaluated every four  
12 weeks.  
13  
14  
15  
16  
17  
18  
19  
20  
21  
22

### 23 *Deviations from protocol*

24  
25  
26 Research staff will emphasize that each participant receives the same dose of exercise (time  
27 and energy expenditure), as differences throughout the intervention group can have negative  
28 repercussions on the  $SD_{IR}$ .<sup>[24]</sup> Accordingly, enrollment will be discontinued if a participant is  
29 unable to achieve the required time allotment for three consecutive weeks, or for a total of four  
30 weeks during either Phase One or Phase Two. If a participant is absent from the trial for a full  
31 week (due to illness, vacation, family emergency, etc.), an additional week will be added at the  
32 end of the trial for that participant for each week missed. A maximum of three weeks throughout  
33 the totality of the trial may be added for a single participant, at which point the participant will be  
34 excluded from further participation. The reason provided for missing a week of training will be  
35 documented and available for interpretation when conducting the final analysis. Enrollment will  
36 also be discontinued if a participant experiences any musculoskeletal injury or other medical event  
37 which prevents or limits safe participation in exercise for three consecutive weeks, or if the  
38 participant receives medical advice to stop participation. Data from these participants will be kept  
39  
40  
41  
42  
43  
44  
45  
46  
47  
48  
49  
50  
51  
52  
53  
54  
55  
56  
57  
58  
59  
60



1  
2  
3 to allow for baseline comparisons. Likewise, if the injury or medical event takes place during  
4  
5 Phase Two, the participant's Phase One data will be included in the analysis, and the reason for  
6  
7 exclusion clearly indicated.  
8  
9

### 10 ***Data collection and management***

11  
12 Participant files will be de-identified, and each participant will be assigned a unique  
13  
14 identifier at the time of first contact with the research staff. All participants will meet with the  
15  
16 research staff for the sole purpose of data collection six times across three timepoints: twice at the  
17  
18 time of enrollment for baseline evaluation, twice between Phase One and Phase Two for mid-point  
19  
20 follow up and to allow for randomization, and twice following Phase Two for post-testing (Table  
21  
22 1). Additionally, participants' heart rate, chosen treadmill speed, and chosen treadmill slope will  
23  
24 be recorded in five-minute segments throughout the duration of every exercise training session.  
25  
26 All data will be collected in written form, and subsequently transferred to electronic files. Physical  
27  
28 versions of all files will be stored locally, in a secure room at the University of New Brunswick.  
29  
30 Digital files will be housed on a secure server operated by the University of New Brunswick.  
31  
32  
33  
34

### 35 ***Outcomes and instrumentation***

#### 36 *Primary outcome*

37  
38 The primary outcome of the INTENSITY trial is HbA1c, analyzed using a DCA Vantage  
39  
40 Analyzer (Siemens, Germany). A finger prick will be conducted using a Safe-T Pro Plus single use  
41  
42 lancet (Accu-Chek, Roche Diagnostics, Switzerland) to allow for the collection of 1 microlitre of  
43  
44 whole blood. The sample will then be loaded into the DCA Vantage Analyzer, where a rapid  
45  
46 assessment of HbA1c is conducted, providing results in approximately six minutes. The DCA  
47  
48 Vantage Analyzer has been shown to provide accurate, valid measures of HbA1c when compared  
49  
50 to laboratory measurements.<sup>[25-27]</sup> To further increase reliability HbA1c will be measured twice at  
51  
52  
53  
54  
55  
56  
57  
58  
59  
60

1  
2  
3 each timepoint, separated by less than seven days, with the mean value used in all analyses. The  
4  
5 potential influence of measurement error will be estimated by calculating the Typical Error (TE;  
6  
7 see below).  
8

### 9 10 *Secondary outcomes*

11  
12 At baseline research staff will record participant demographics, family history of  
13  
14 cardiovascular and cardiometabolic disease, and current medication use. Participants will be  
15  
16 monitored by the research staff throughout the study and required to report any changes in  
17  
18 medication use. These changes will be confirmed at each testing time point. To confirm current  
19  
20 physical activity patterns and ensure eligibility, participants will then complete the Physical  
21  
22 Activity and Sedentary Behaviour Questionnaire to assess current physical activity and sedentary  
23  
24 behaviours (Canadian Society for Exercise Physiology, 2013), and will be sent home with a Piezo  
25  
26 Rx pedometer (StepsCount, Deep River, ON, Canada). Research staff will instruct each participant  
27  
28 to wear the pedometer for seven consecutive days, excluding sleep time, and to remove the  
29  
30 pedometer prior to any activity with the potential to submerge the device in water. If the pedometer  
31  
32 is lost or not worn, participants will be required to wear the device for another seven days.  
33  
34  
35  
36

37  
38 At each timepoint physiological and anthropometric measurements will occur over the span  
39  
40 of two days, separated by less than one week. Participant height, systolic and diastolic blood  
41  
42 pressure, and waist circumference will be measured by a member of the research team in  
43  
44 accordance with Canadian Society for Exercise Physiology protocols.[28] Body mass, fat mass,  
45  
46 and fat free mass will be estimated using the BODPOD (COSMED; Rome, Italy) following a 12-  
47  
48 hour overnight fast. The BODPOD is a highly valid and reliable method for assessing body  
49  
50 composition.[29,30] All cardiorespiratory fitness ( $VO_2$ peak) evaluations will be supervised by TH.  
51  
52  
53 The original Balke and Ware treadmill test protocol[31] has been amended for this study, to fit  
54  
55  
56  
57  
58  
59  
60

1  
2  
3 within the restrictions of the available equipment. Participants will walk at 3.4 miles per hour  
4 (mph) at 0% grade on a treadmill (9500HR [Life Fitness, Illinois, USA]). After two minutes the  
5  
6 (mph) at 0% grade on a treadmill (9500HR [Life Fitness, Illinois, USA]). After two minutes the  
7  
8 grade will be increased to 5.0%, and progressively increase by 1.0% every minute thereafter until  
9  
10 15.0% is achieved. If the participant is not fatigued, the grade will be maintained, and the speed  
11  
12 increased by 0.5 mph each minute until volitional fatigue. Gas exchange and heart rate will be  
13  
14 continuously gathered using a TrueOne 2400 Metabolic Cart (ParvoMedics, Salt Lake City, UT,  
15  
16 USA) and Polar FT1 heart rate monitor (Polar, Kempele, Finland), respectively.  $VO_2$ peak will be  
17  
18 identified as the highest achieved 15-second average  $VO_2$ . Following the treadmill test, participant  
19  
20 METs and heart rate values will be reviewed by TH, and the heart rate associated with an intensity  
21  
22 of 4.5 or 6.0 METs (in line with the current exercise prescription) will be identified. The identified  
23  
24 heart rate value will be used to prescribe and monitor participant intensity during subsequent  
25  
26 training sessions, until cardiorespiratory fitness is re-evaluated. Should the exact MET value not  
27  
28 be observed during the test, the next closest value below the desired MET value (i.e. 4.4 or 5.9  
29  
30 METS) will be used. The same research staff member (TH) will be present at each assessment to  
31  
32 reduce the potential for inter-rater differences to skew results.  
33  
34  
35  
36

### 37 *Cardiorespiratory fitness re-evaluation*

38  
39  
40 Every four weeks throughout each Phase, a staff member will re-evaluate each participant  
41  
42 to ensure adaptations in cardiorespiratory fitness are accounted for. Replicating a typical exercise  
43  
44 session, participants will warm-up and workout while gas exchange and heart rate are recorded  
45  
46 using a TrueOne 2400 Metabolic Cart (Parvomedics, Salt Lake City, UT, USA) and Polar FT1  
47  
48 heart rate monitor (Polar, Kempele, Finland), respectively. The participant will remain in control  
49  
50 of the treadmill grade and speed and instructed to increase intensity as needed until the desired  
51  
52 MET value (4.5 or 6.0 METs) is achieved and maintained for a period of one minute, as observed  
53  
54  
55  
56  
57  
58  
59  
60

1  
2  
3 by the supervising staff member. Exercise accumulated during the re-evaluation will count towards  
4 the required weekly training time. The target heart rate identified during the fitness re-evaluation  
5 will be used for all subsequent training sessions, until the next re-evaluation is completed. The  
6 same research staff member (TH) will review the results of every re-evaluation to ensure  
7 consistency throughout the trial. A submaximal re-evaluation protocol was chosen in place of  
8 repeated administration of the maximal testing protocol to avoid the potential influence of repeated  
9 maximal tests on the outcomes, and to maximize participant comfort and compliance.

### 19 *Exercise monitoring*

20  
21 To ensure participants are exercising at the appropriate intensity, research staff will monitor  
22 and record participant heart rate in five-minute intervals using the Polar Team2 (Polar, Kempele,  
23 Finland) heart rate monitoring system, treadmill speed and treadmill slope. The supervising  
24 research staff member will ensure each participant's heart rate throughout each training session  
25 remains within  $\pm 2.5\%$  of heart rate associated with the assigned MET value (as identified during  
26 the cardiorespiratory fitness test or subsequent re-evaluation).  
27  
28  
29  
30  
31  
32  
33

### 34 *Blinding*

35  
36  
37 Participants and all research staff who assess, train, or otherwise interact with participants  
38 will be blinded to all follow-up measures of HbA1c, as well as the participant responder  
39 categorization. To maintain blinding, research staff who do not normally interact with participants  
40 will be responsible for the collection and recording of HbA1c results, determining individual  
41 participant responder status, and completing the randomization process. Group allocation for Phase  
42 Two will then be told to TH, who will disseminate the required training protocol to other research  
43 staff and participants.  
44  
45  
46  
47  
48  
49  
50  
51  
52

### 53 *Randomization*

1  
2  
3 Randomization of intervention participants will occur after the follow-up assessment prior  
4 to Phase Two. A member of the Cardiometabolic Exercise & Lifestyle Laboratory (CELLAB) staff  
5 not related to the project will collect the HbA1c values following Phase One, calculate the  
6 participant's change score, and determine the response categorization, which will be  
7 communicated via email to DRB, who has no contact with participants. The response  
8 categorization will be entered into a random number generator (SPSS version 22.0) to decide the  
9 Phase Two arm allocation. Randomization will occur in blocks of 10 (five per group) based on  
10 participant response status (responder vs. non-responder and uncertain responder). Blocks of five  
11 for each group were chosen for the randomization procedure due to the inability to predict the  
12 proportion of participants which would be categorized as responders or non-responders/uncertain  
13 responders, as a method to reduce potential biases and maximize the likelihood of achieving  
14 balance between the maintained intensity and increased intensity groups. The Phase Two arm for  
15 the participant will be communicated to TH via email by the member of the CELLAB staff.  
16  
17  
18  
19  
20  
21  
22  
23  
24  
25  
26  
27  
28  
29  
30  
31  
32

### 33 ***Statistical analysis***

34  
35 The sample size calculation was based on the anticipated change in the primary outcome  
36 measure, HbA1c, following Phase One of the trial. A meta-analysis conducted by Umpierre et al.,  
37 (2011)[32] indicates supervised aerobic exercise training of 12 weeks or longer is associated with  
38 a 0.73% reduction in HbA1c, which is anticipated here. Given a desired power of 80% and alpha  
39 of 0.05, a generalized linear model with a linear auto-regression structure (to account for the  
40 duplicate measures of HbA1c) was used to calculate the necessary sample size. A sample of 42  
41 participants was identified to detect significant changes in HbA1c in Phase One of the trial.  
42 Provided an anticipated 20% drop-out rate, 50 participants will be recruited to participate in the  
43 intervention group. All participants who complete Phase One are anticipated to continue and  
44  
45  
46  
47  
48  
49  
50  
51  
52  
53  
54  
55  
56  
57  
58  
59  
60

1  
2  
3 complete Phase Two. An additional 10 participants will be recruited for allocation to the time-  
4  
5 matched control group.  
6

7  
8 *Objective 1: Identify the number of exercise non-responders, based on the observed*  
9  
10 *changes in HbA1c, across individuals living with prediabetes or T2DM following 16 weeks of*  
11  
12 *continuous aerobic exercise training.* Individuals will be categorized as responders if the observed  
13  
14 change can confidently be assumed to be beyond the MCID, while accounting for the variation-  
15  
16 induced changes experienced by the time-matched control group. Accordingly, individual 90% CI  
17  
18 for each participant will be calculated using the equation outlined by Swinton et al. (2018)<sup>[19]</sup>:  
19

$$20 \quad \text{Individual CI} = (\text{Observed score}_{\text{MID}} - \text{Observed score}_{\text{BASELINE}}) \pm (\text{CI multiplier} \times \text{SD}_{\text{CON}}).$$

21  
22 Here, the  $\text{SD}_{\text{CON}}$  allows for potential variation introduced in the absence of the intervention to be  
23  
24 considered when constructing each CI. As the sample size of the control group may influence the  
25  
26 certainty of the CI, the CI multiplier will be adjusted for a control sample size of 10 individuals  
27  
28 (CI multiplier = 1.83)<sup>[19]</sup>. The individual CIs will be evaluated against a threshold of clinical  
29  
30 relevance. In line with the Federal Drug Agency and the European Medicines Agency, an MCID  
31  
32 of 0.3% for HbA1c will be used.[33,34]  
33  
34  
35  
36

37  
38 *Objective 2: Explore if increasing the intensity and/or increasing the duration of exercise*  
39  
40 *training will 'rescue' previously identified non-responders by garnering improvements in HbA1c.*  
41  
42 Following the completion of Phase Two, the categorization procedure conducted during Objective  
43  
44 2 will be repeated for all previously identified uncertain and non-responders, with important  
45  
46 adjustments made to the CI equation. The  $\text{SD}_{\text{CON}}$  will be re-calculated with the standard deviation  
47  
48 of the pre-post difference scores from the control group using HbA1c measurements taken at  
49  
50 midpoint and follow-up post testing. This will allow for the CIs to represent the potential the  
51  
52  
53  
54  
55  
56  
57  
58  
59  
60

1  
2  
3 variation-induced changes experienced by the time-matched control group across the second, 12-  
4 week period for Objective 3.  
5

6  
7 Accordingly, the individual 90% CIs will be calculated using the equation outlined by  
8 Swinton et al. (2018):  
9

$$\text{Individual CI} = (\text{Observed score}_{\text{POST}} - \text{Observed score}_{\text{MID}}) \pm (\text{CI multiplier} \times [\text{SD}_{\text{CON}}]).$$

10  
11  
12 Individual CIs will again be evaluated against the MCID response threshold of 0.3%, and  
13 participants re-categorized as previously described. The raw number of participants who were  
14 previously categorized as a non-responder or uncertain responder that are categorized as  
15 responders after completing Phase Two will be reported.  
16  
17  
18  
19  
20  
21  
22

### 23 **Ethics and dissemination**

24  
25 All experimental procedures have been approved by the Research Ethics Board at the  
26 University of New Brunswick (REB: 2018-168). Any substantial protocol amendments will be  
27 sent to the Research Ethics Board for review and approval prior to implementation.  
28  
29  
30  
31

### 32 ***Informed Consent***

33  
34 At the time of first contact with a member of the research staff, interested individuals will  
35 be provided with information about the study and have their eligibility confirmed. Eligible  
36 individuals will be provided with a digital copy of the consent form prior to the first meeting. At  
37 the initial meeting, all eligible individuals will be provided with adequate time to review a physical  
38 copy of the consent form (Supplementary File 1), ask any questions, and consider their  
39 participation. If the individual decides to become a participant, they will be asked to provide  
40 written consent, which will be countersigned by the research staff. All participants are free to  
41 withdraw from the study at any time.  
42  
43  
44  
45  
46  
47  
48  
49  
50  
51  
52

### 53 **Dissemination**

1  
2  
3 Results will be presented at scientific meetings and submitted to peer-reviewed journals.  
4  
5 All publications and presentations related to the study will be authorized and reviewed by all  
6  
7 investigators. Findings from this study will be used to develop and provide support for future  
8  
9 randomized control trials. All study participants will have the option at the time of consent to  
10  
11 request a copy of the study findings at the time of completion. A summary of the findings will be  
12  
13 provided to all participants who indicate a desire to receive it.  
14  
15

### 16 **Trial status**

17  
18  
19 The study is currently recruiting and enrolling participants. The first participant was  
20  
21 recruited in May 2019, and recruitment is expected to be complete in November 2020. The  
22  
23 expected completion date of the project, including all follow-up appointments, is June 2021.  
24  
25  
26  
27  
28  
29  
30  
31  
32  
33  
34  
35  
36  
37  
38  
39  
40  
41  
42  
43  
44  
45  
46  
47  
48  
49  
50  
51  
52  
53  
54  
55  
56  
57  
58  
59  
60



### **Contributor Statement**

Dr. Martin Sénéchal is the primary investigator. Dr. Danielle Bouchard, Dr. Brendon Gurd and Travis Hrubeniuk contributed to the study design and analysis methods. Travis Hrubeniuk will coordinate study implementation and data collection. All authors contributed to the completion and approved the final version of this manuscript. The study sponsor had no input to the design, implementation, interpretation, or any decision making of this study. The authors would also like to thank the patient advisers who contributed to the study.

### **Competing Interests**

The authors have no competing interests to report.

### **Funding**

This work is supported by grants from The Heart and Stroke Foundation New Brunswick (unspecified award number) and New Brunswick Health Research Foundation (2018-19). TH salary was supported by a combined New Brunswick Health Research Foundation and Maritime SPOR Support Unit studentship (2017-MSSUSF-1246).

### **Access to Data**

Following trial completion, only those investigators listed as author above, and necessary research staff will have access to the dataset.

### **Data Sharing Statement**

No data are available for sharing.

## References

- 1 Tremblay MS, Warburton DER, Janssen I, *et al.* New Canadian Physical Activity Guidelines. *Appl Physiol Nutr Metab* 2011;**36**:36–46. doi:10.1139/H11-009
- 2 Piercy KL, Troiano RP, Ballard RM, *et al.* The Physical Activity Guidelines for Americans. *JAMA* 2018;**320**:2020–8. doi:10.1001/jama.2018.14854
- 3 Diabetes Canada Clinical Practice Guidelines Expert Committee. Diabetes Canada 2018 Clinical Practice Guidelines for the Prevention and Management of Diabetes in Canada. *Can J Diabetes* 2018;:S1–325.
- 4 World Health Organization. Global Recommendations on Physical Activity for Health. *WHO Press* 2010.
- 5 Brown WJ, Bauman AE, Bull F, *et al.* Development of Evidence-based Physical Activity Recommendations for Adults (18-64 years). Australia: : Commonwealth of Australia 2013.
- 6 Alvarez C, Ramírez-Campillo R, Ramírez-Vélez R, *et al.* Effects of 6-Weeks High-Intensity Interval Training in Schoolchildren with Insulin Resistance: Influence of Biological Maturation on Metabolic, Body Composition, Cardiovascular and Performance Non-responses. *Front Physiol* 2017;**8**. doi:10.3389/fphys.2017.00444
- 7 Gurd BJ, Giles MD, Bonafiglia JT, *et al.* Incidence of nonresponse and individual patterns of response following sprint interval training. *Appl Physiol Nutr Metab* 2015;**41**:229–34. doi:10.1139/apnm-2015-0449
- 8 Ross R, de Lannoy L, Stotz PJ. Separate Effects of Intensity and Amount of Exercise on Interindividual Cardiorespiratory Fitness Response. *Mayo Clinic Proceedings* 2015;**90**:1506–14. doi:10.1016/j.mayocp.2015.07.024
- 9 Bouchard C, Blair SN, Church TS, *et al.* Adverse Metabolic Response to Regular Exercise: Is It a Rare or Common Occurrence? *PLOS ONE* 2012;**7**:e37887. doi:10.1371/journal.pone.0037887
- 10 Hecksteden A, Pitsch W, Rosenberger F, *et al.* Repeated testing for the assessment of individual response to exercise training. *Journal of Applied Physiology* Published Online First: 11 January 2018. doi:10.1152/jappphysiol.00896.2017
- 11 Phillips BE, Kelly BM, Lilja M, *et al.* A Practical and Time-Efficient High-Intensity Interval Training Program Modifies Cardio-Metabolic Risk Factors in Adults with Risk Factors for Type II Diabetes. *Front Endocrinol* 2017;**8**. doi:10.3389/fendo.2017.00229
- 12 Montero D, Lundby C. Refuting the myth of non-response to exercise training: ‘non-responders’ do respond to higher dose of training. *J Physiol* 2017;**595**:3377–87. doi:10.1113/JP273480

- 1  
2  
3 13 Lannoy L de, Clarke J, Stotz PJ, *et al.* Effects of intensity and amount of exercise on measures  
4 of insulin and glucose: Analysis of inter-individual variability. *PLOS ONE* 2017;**12**:e0177095.  
5 doi:10.1371/journal.pone.0177095  
6
- 7  
8 14 Leifer ES, Mikus CR, Karavirta L, *et al.* Adverse Cardiovascular Response to Aerobic  
9 Exercise Training: Is This a Concern? *Medicine & Science in Sports & Exercise* 2016;**48**:20–  
10 5. doi:10.1249/MSS.0000000000000752  
11
- 12 15 Sénéchal M, Rempel M, Duhamel TA, *et al.* Fitness is a determinant of the metabolic response  
13 to endurance training in adolescents at risk of type 2 diabetes mellitus. *Obesity* 2015;**23**:823–  
14 32. doi:10.1002/oby.21032  
15
- 16 16 Hecksteden A, Kraushaar J, Scharhag-Rosenberger F, *et al.* Individual response to exercise  
17 training - a statistical perspective. *Journal of Applied Physiology* 2015;**118**:1450–9.  
18 doi:10.1152/jappphysiol.00714.2014  
19
- 20 17 Hopkins WG. Measures of Reliability in Sports Medicine and Science. *Sports Med* 2000;**30**:1–  
21 15. doi:10.2165/00007256-200030010-00001  
22
- 23 18 Hopkins WG. Individual responses made easy. *Journal of Applied Physiology* 2015;**118**:1444–  
24 6. doi:10.1152/jappphysiol.00098.2015  
25
- 26 19 Swinton PA, Hemingway BS, Saunders B, *et al.* A Statistical Framework to Interpret  
27 Individual Response to Intervention: Paving the Way for Personalized Nutrition and Exercise  
28 Prescription. *Front Nutr* 2018;**5**. doi:10.3389/fnut.2018.00041  
29
- 30 20 Ross R, Goodpaster BH, Koch LG, *et al.* Precision exercise medicine: understanding exercise  
31 response variability. *Br J Sports Med* Published Online First: 12 March 2019.  
32 doi:10.1136/bjsports-2018-100328  
33
- 34 21 Walsh JJ, Bonafiglia JT, Goldfield GS, *et al.* Interindividual variability and individual  
35 responses to exercise training in adolescents with obesity. *Appl Physiol Nutr Metab*  
36 2019;**45**:45–54. doi:10.1139/apnm-2019-0088  
37
- 38 22 Marsh CE, Thomas HJ, Naylor LH, *et al.* Fitness and strength responses to distinct exercise  
39 modes in twins: Studies of Twin Responses to Understand Exercise as a Therapy (STRUETH)  
40 study. *The Journal of Physiology* 2020;**n/a**. doi:10.1113/JP280048  
41
- 42 23 Gupta N. Charting the Progression of Diabetes Mellitus in New Brunswick: Rates, Correlates,  
43 and Implications for Accountability in Public Policy. *I* Published Online First: 23 November  
44 2017. <https://journals.lib.unb.ca/index.php/JNBS/article/view/25880> (accessed 25 Jul 2019).  
45
- 46 24 Bonafiglia JT, Brennan AM, Ross R, *et al.* An appraisal of the SDIR as an estimate of true  
47 individual differences in training responsiveness in parallel-arm exercise randomized  
48 controlled trials. *Physiological Reports* 2019;**7**:e14163. doi:10.14814/phy2.14163  
49  
50  
51  
52  
53  
54  
55  
56  
57  
58  
59  
60

- 1  
2  
3 25 Sánchez-Mora C, Rodríguez-Oliva MS, Fernández-Riejos P, *et al.* Evaluation of two HbA1c  
4 point-of-care analyzers. *Clinical Chemistry and Laboratory Medicine (CCLM)* 2011;**49**:653–  
5 7. doi:10.1515/CCLM.2011.101  
6  
7  
8 26 Mardis C, Foohey L. Laboratory-Quality Hemoglobin A1c Results at the Point of Care With  
9 DCA Vantage Analyzer. *Point of Care* 2017;**16**:63–6. doi:10.1097/POC.000000000000130  
10  
11 27 Szymezak J, Leroy N, Lavalard E, *et al.* Evaluation of the DCA Vantage analyzer for HbA1c  
12 assay. *Clinical Chemistry and Laboratory Medicine (CCLM)* 2008;**46**:1195–8.  
13 doi:10.1515/CCLM.2008.228  
14  
15 28 Canadian Society for Exercise Physiology. *Canadian Society for Exercise Physiology -*  
16 *Physical Activity Training for Health (CSEP-PATH)*. Canadian Society for Exercise  
17 Physiology 2013.  
18  
19 29 Bailey BW, Tucker LA, Peterson TR, *et al.* Test-retest reliability of body fat percentage results  
20 using dual energy x-ray absorptiometry and the BOD POD. *Medicine & Science in Sports &*  
21 *Exercise* 2001;**33**:S174.  
22  
23 30 Vescovi JD, Zimmerman SL, Miller WC, *et al.* Evaluation of the BOD POD for estimating  
24 percentage body fat in a heterogeneous group of adult humans. *Eur J Appl Physiol*  
25 2001;**85**:326–32. doi:10.1007/s004210100459  
26  
27 31 Balke B, Ware RW. The present status of physical fitness in the air force. *US Armed Forces*  
28 *Med J* 1959;**10**:675–88.  
29  
30 32 Umpierre D, Ribeiro PAB, Kramer CK, *et al.* Physical Activity Advice Only or Structured  
31 Exercise Training and Association With HbA1c Levels in Type 2 Diabetes: A Systematic  
32 Review and Meta-analysis. *JAMA* 2011;**305**:1790–9. doi:10.1001/jama.2011.576  
33  
34 33 Center for Drug Evaluation and Research. Guidance for industry diabetes mellitus: developing  
35 drugs and therapeutic biologics for treatment and prevention. 2008.  
36  
37 34 Committee for Medicinal Products for Human Use. Guideline on clinical investigation of  
38 medicinal products in the treatment or prevention of diabetes mellitus. 2012.  
39  
40  
41  
42  
43  
44  
45  
46  
47  
48  
49  
50  
51  
52  
53  
54  
55  
56  
57  
58  
59  
60

Table 1. Measurement timeline



|                                         | <b>Weeks</b> |          |                                                                                                                                   |  |  |  |                      |          |                                                                                                                                   |  |           |          |   |  |  |   |   |
|-----------------------------------------|--------------|----------|-----------------------------------------------------------------------------------------------------------------------------------|--|--|--|----------------------|----------|-----------------------------------------------------------------------------------------------------------------------------------|--|-----------|----------|---|--|--|---|---|
|                                         | <b>1</b>     |          | <b>2 – 17</b>                                                                                                                     |  |  |  | <b>18</b>            |          | <b>19 – 31</b>                                                                                                                    |  | <b>32</b> |          |   |  |  |   |   |
| <b>Visit</b>                            | <b>1</b>     | <b>2</b> | <b>Phase One</b>                                                                                                                  |  |  |  | <b>3</b>             | <b>4</b> | <b>Phase Two</b>                                                                                                                  |  | <b>5</b>  | <b>6</b> |   |  |  |   |   |
| Demographics & Family History           | X            |          | <b>16 weeks exercise training</b><br>(Approximately 3-5 visits per week)<br><b>Submaximal fitness re-evaluation every 4 weeks</b> |  |  |  | <b>Randomization</b> |          | <b>12 weeks exercise training</b><br>(Approximately 3-5 visits per week)<br><b>Submaximal fitness re-evaluation every 4 weeks</b> |  |           |          |   |  |  |   |   |
| Medication Use                          | X            |          |                                                                                                                                   |  |  |  |                      |          |                                                                                                                                   |  |           |          |   |  |  | X |   |
| Anthropometrics & Blood Pressure        | X            |          |                                                                                                                                   |  |  |  |                      |          |                                                                                                                                   |  |           | X        |   |  |  | X |   |
| Glycemic Control                        | X            | X        |                                                                                                                                   |  |  |  |                      |          |                                                                                                                                   |  |           | X        | X |  |  | X | X |
| Cardiorespiratory Fitness               | X            |          |                                                                                                                                   |  |  |  |                      |          |                                                                                                                                   |  |           | X        |   |  |  | X |   |
| Physical Activity & Sedentary Behaviour | X            |          |                                                                                                                                   |  |  |  |                      |          |                                                                                                                                   |  |           |          |   |  |  | X |   |

1  
2  
3 **Figure Captions**  
4

5 **Figure 1. Participant Flowchart**  
6  
7  
8  
9  
10  
11  
12  
13  
14  
15  
16  
17  
18  
19  
20  
21  
22  
23  
24  
25  
26  
27  
28  
29  
30  
31  
32  
33  
34  
35  
36  
37  
38  
39  
40  
41  
42  
43  
44  
45  
46  
47  
48  
49  
50  
51  
52  
53  
54  
55  
56  
57  
58  
59  
60

For peer review only

1  
2  
3  
4  
5  
6  
7  
8  
9  
10  
11  
12  
13  
14  
15  
16  
17  
18  
19  
20  
21  
22  
23  
24  
25  
26  
27  
28  
29  
30  
31  
32  
33  
34  
35  
36  
37  
38  
39  
40  
41  
42  
43  
44  
45  
46  
47  
48  
49  
50  
51  
52  
53  
54  
55  
56  
57  
58  
59  
60

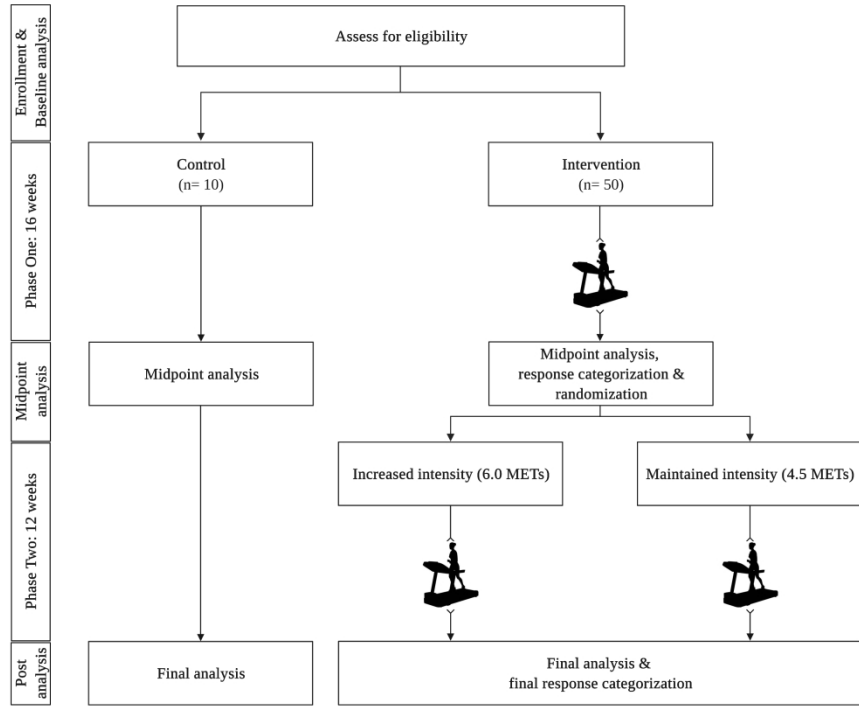

Figure 1. Participant Flowchart

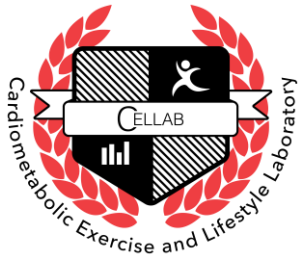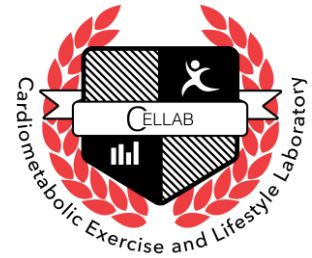

## PARTICIPANT INFORMATION AND CONSENT FORM

| Name                                                                                                                                                                                                                                                                                                                                                                                                                                                          | Role                      |
|---------------------------------------------------------------------------------------------------------------------------------------------------------------------------------------------------------------------------------------------------------------------------------------------------------------------------------------------------------------------------------------------------------------------------------------------------------------|---------------------------|
| <p><b>Dr. Martin Sénéchal, Ph.D. CSEP-CEP</b><br/>           Assistant Professor, Faculty of Kinesiology, University of New Brunswick<br/>           Co-Director: Cardiometabolic Exercise &amp; Lifestyle Laboratory (CELLAB)<br/>           Affiliated Member of IMPART Team Canada<br/>           90 Mackey Drive (Room 319)<br/>           Fredericton, NB, E3B 5A3<br/>           Phone: (506) 451-6889<br/>           msenecha@unb.ca</p>               | Principal Investigator    |
| <p><b>Dr. Danielle R. Bouchard, Ph.D. CSEP-CEP</b><br/>           Associate Professor, Faculty of Kinesiology, University of New Brunswick<br/>           Co-Director: Cardiometabolic Exercise &amp; Lifestyle Laboratory (CELLAB)<br/>           Affiliated Member of IMPART Team Canada<br/>           90 Mackay Drive (Room 322)<br/>           Fredericton, NB, E3B 5A3<br/>           Phone: (506) 443-3908<br/>           danielle.bouchard@unb.ca</p> | Co-Principal Investigator |
| <p><b>Travis Hrubeniuk, MSc. CSEP-CPT</b><br/>           PhD Student, Interdisciplinary Studies, University of New Brunswick<br/>           90 Mackey Drive (Room 105)<br/>           Fredericton, NB, E3B 5A3,<br/>           Phone: (506) 458-7034<br/>           travis.hrubeniuk@unb.ca</p>                                                                                                                                                               | Co-Investigator           |
| <p><b>Brittany V. Rioux, MScESS</b><br/>           PhD Student, Interdisciplinary Studies, University of New Brunswick<br/>           90 Mackay Drive (Room 105)<br/>           Fredericton, NB, E3B 5A3<br/>           Phone: (506) 458-7034<br/>           rioux.brittany@unb.ca</p>                                                                                                                                                                        | Co-Investigator           |

**Sponsor:** This Research Project is Supported by the Heart and Stroke Foundation of New Brunswick, The New Brunswick Health Research Foundation and an Establishment Grant from the New Brunswick of Health Research Foundation.

### INTRODUCTION

You are being asked to participate in this research study. Please take time to review this consent form and discuss any questions you may have with the study staff before agreeing to participate in the described experimental research. You may discuss it with your regular doctor, friends, and/or family



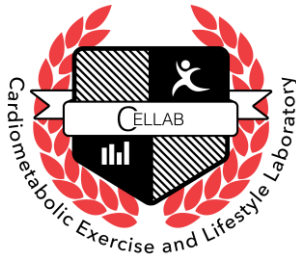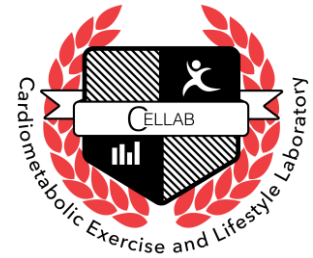

before you make your final decision. This consent form may contain words that you do not understand. Please ask the Principal Investigator, Co-Investigators, or study staff to explain any words or information you do not clearly understand.

## BACKGROUND OF STUDY

The prevalence of Type-2 diabetes has increased worldwide, and New Brunswick is no exception. It is understood that exercise can be an effective way to control blood glucose and prevent the progression towards Type-2 diabetes. However, research suggests there is large interindividual variation in the blood glucose response to any exercise program. This is believed to result in a number of people who do not benefit from exercise, known as non-responders. Emerging evidence proposes that altering an exercise program and providing a sufficient exercise stimulus can improve the number of people who respond to exercise, leading to a reduction in the number of non-responders. While this is encouraging, to date there have been no attempts to reduce the number of non-responders across a population of individuals living with prediabetes or Type-2 diabetes, or to observe if there are long-term health implications associated with responding (or not responding) to exercise.

This study is being conducted based on previous studies that indicated an increase in exercise intensity can lead to a higher proportion of exercise responders (In other words, more people benefiting from exercise). In addition, no research has looked at the effects of maintaining the original exercise prescription and comparing it to a higher intensity exercise prescription. We suspect that; 1) a meaningful number of participants will not improve their blood glucose following the original 16-week exercise prescription, 2) the non-responder participants who increase the intensity of the exercise prescription during the next 12-weeks will see an greater improvement in their blood glucose levels compared to the non-responders who continue with the original program, and 3) responding to the exercise program will lead to health benefits 1-year following the cessation of the exercise programs.

## OBJECTIVES OF THE STUDY

The purpose of this study is to find out 1) how common non-response to a standard exercise program is amongst individuals living with prediabetes or Type-2 diabetes, 2) if increasing the intensity of the exercise program can lead to more responders than simply maintaining current exercise, and 3) if there are long-term benefits associated with responding.

## WHY WERE YOU ASKED TO PARTICIPATE IN THIS STUDY?

You are being asked to take part in this study because you are above 19 years of age, currently have blood glucose levels that indicate you may be living with prediabetes or Type-2 diabetes and are not currently engaged in a structured exercise program. A total of 60 participants will be in this study.

## Participation Timeline:

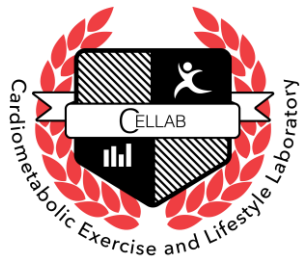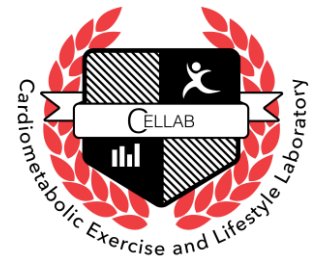

| Week                                                  | 1 |   | 2 – 17                                                                                  | 18 |    | 19 – 31                                                                               | 32 |    | 84 |   |
|-------------------------------------------------------|---|---|-----------------------------------------------------------------------------------------|----|----|---------------------------------------------------------------------------------------|----|----|----|---|
| Visit                                                 | 1 | 2 | 3 – 50                                                                                  | 51 | 52 | 53 – 88                                                                               | 89 | 90 | 91 |   |
| Questionnaires                                        | X |   | 16 weeks exercise training<br>(Approximately 3-5 visits each week totaling 150 minutes) |    |    | 12 weeks exercise training<br>(Approximately 3 visits each week totaling 150 minutes) |    |    | X  |   |
| Height, Weight, Waist Circumference, Body Composition | X |   |                                                                                         | X  |    |                                                                                       | X  |    |    | X |
| Physical Activity & Dietary Assessment                | X |   |                                                                                         |    |    |                                                                                       | X  |    |    | X |
| Bloodwork                                             | X | X | Submaximal fitness testing every 4 weeks                                                | X  | X  | Submaximal fitness testing every 4 weeks                                              | X  | X  | X  |   |
| Fitness Test                                          | X | X |                                                                                         | X  | X  |                                                                                       | X  | X  | X  | X |
| Feces collection                                      | X |   |                                                                                         | X  |    |                                                                                       | X  |    |    |   |

**STUDY PROCEDURES**

Listed below are the tests and procedures involved in participating in this study:

1. Medical History

You will be asked a series of questions regarding your health and any current medications being taken.

2. Physical Activity, Dietary Recall, Screen Time and Sedentary Behaviour, Self-Regulation Eating and Addiction Questionnaires

You will be asked to complete a series of questionnaires outlining your current level of physical activity and sedentary behaviour, the total amount of screen time you engage in, and your dietary habits. In addition, questionnaires about your self-regulation and potential eating addiction will be completed.

3. Gender Role and Mental Health Questionnaires

You will be asked to fill out questionnaires meant to help us adequately understand your perceived gender role and understand your current mental health status.

4. Body Measurements

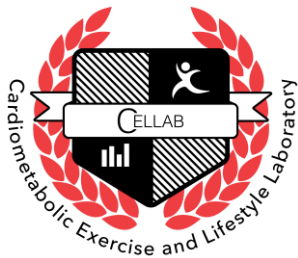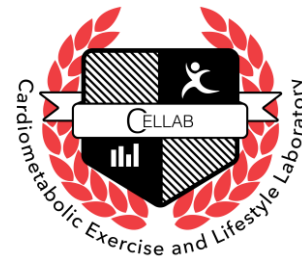

We will measure your body weight, height, and take a measurement of your waist circumference.

#### 5. Body Composition

We will look at the amount of muscle and fat in your body using a Bod Pod. In order to do that, you will be asked to wear a bathing suit and swim cap while sitting in a device called the Bod Pod. The Bod Pod resembles an egg-shaped chamber with a window for you to look out of. Air will move into the enclosed space where you sit and you may feel a slight change in air pressure. While enclosed in this chamber, if you begin to feel uncomfortable, you can press a button located by your knee to open the door. The Bod Pod measures the airflow and the changes in the airflow that occur while your body is in the chamber. You are to sit quietly while the first measurements of airflow are conducted. This takes about 30 seconds, at which time the technician will open and close the Bod Pod door to repeat the measurement again. The whole test takes approximately 5 minutes. The test is performed in a private room. To accurately complete this test, it is required that you do not eat or drink any beverage for at least 4 hours, or smoke for at least 2 hours before the test starts.

#### 6. Blood Work at UNB

A registered nurse will take a draw of your blood (equating to approximately 6 tablespoons) for our analysis purposes. Specifically, we will analyze the concentrations of glucose, insulin, and a protein named irisin, present in your blood. To complete this test, it is required that you fast overnight.

#### 7. Fitness Test

At the CELLAB we will measure your heart and lung fitness levels. This test takes approximately 8 to 12 minutes. The exercise test will be performed on a treadmill. We will measure your heart rate and blood pressure during the test. Heart rate will be measured with a small black band around your chest, and blood pressure is measured with a cuff on your arm. We will also measure your breathing during the exercise test. To do this, you will be required to wear a mouth piece or mask to properly throughout the test. To start, you will be asked to walk at an easy pace with no incline. We will then progressively increase the slope 1% every minute. You will decide when to stop the test; the study staff will encourage you to continue as long as you can. To accurately complete this test, it is required that you do not consume caffeine, eat, or smoke within 3 hours, or exercise within 12 hours of the test.

#### 8. Physical Activity and Dietary Assessment

You will leave the CELLAB with a pedometer to wear for seven days following the first visit. The pedometer is a small device that you will be asked to wear on your left hip to track your daily physical activity levels. This device must be returned upon completion. You will also receive physical activity log to fill out for one week, asking you to take record of how many steps you took each day, alongside any additional physical



activity you complete. Finally, you will receive a dietary log to be completed every day for one week. On this log you will need to record any food and/or beverage you consume every day for one week.

## 9. Exercise Training

Following visit 1 and 2, you will be randomized into one of two groups. The first group will not be provided any exercise intervention to complete from week 2 to 17, or from week 19 to 31. However, various prizes will be awarded to those participants who successfully show up to all testing sessions (week 1, week 18, week 32). Once this group has completed the final testing, they will be offered to opportunity to partake in the exercise offered to the second group.

The second group will be prescribed moderate intensity aerobic exercise from weeks 2 to 17. During the first week of exercise, you will be required to complete 80 minutes of moderate intensity aerobic exercise. The duration of exercise will slightly increase in each subsequent week for the first four weeks of exercise training (week 2 – 5). From week 6 – 17 you will complete 150 minutes of moderate intensity aerobic exercise per week. The CELLAB will be open at various times throughout the week, providing you with ample opportunity to complete the required exercise. Optimally, participants will come three times per week, with each session consisting of 50 minutes of exercise. The minimum number of sessions that can be used to complete the 150 minutes of exercise is **two**. Every four weeks you will complete a submaximal treadmill walking test (as described below) to allow the study group to adjust the intensity of your training to your potentially improved fitness level.

After testing visits 51 and 52 (during week 18), participants in the second group will be randomized into two exercise programs. **You will not be informed if you are a responder or a non-responder until the study is completed.** Participants in the first exercise program will continue their current exercise prescription for 12 weeks (week 19 – 31). Participants randomized to the second exercise program will still complete 150 minutes of exercise per week, however they will do so at a slightly higher intensity (moderate to vigorous). Submaximal treadmill walking tests will again be completed every four weeks to allow the study group to adjust exercise Intensity as necessary.

## 10. Submaximal Fitness Tests

Every four weeks throughout the exercise training you will complete a submaximal treadmill walking test. We will measure your heart rate and your breathing during the test. Heart rate will be measured with a small black band around your chest. Measuring your breathing will required to wear a mouth piece or mask while walking on the treadmill for 4 minutes at a pre-determined grade and speed.

## 11. Feces collection

You will be asked to provide a fecal sample at baseline, after the initial 16 weeks of exercise and at post-testing. Therefore, a total of 3 time-points will be recorded. Although this type of measurement is usually unpleasant, we have taken every means available to make this as easy as possible for you. A fecal sample collection kit will be provided by our research team. The research staff will provide you with detailed instructions as well as an instructional online video. The fecal sample will be collected by you, in your



home, and then brought back to the lab within 2 days. The sample will be stored appropriately in a -80°C freezer. This procedure does not have any risk associated with it, other than the potential discomfort associated with the collection (which will happen in the comfort of your home). The collection of fecal samples will provide further insight into exercise responders vs. non-responders (using glycemic control), following an exercise intervention.

## STUDY VISITS

**Visit 1 & 2** (within 1 week of each other)

**Location: UNB CELLAB**

- Review and sign the Informed Consent (Visit 1 only)
- Medical History (Visit 1 only)
- Questionnaires (Visit 1 only)
- Weight, height, hip, and waist measurement
- Body Composition
- Bloodwork
- Fitness Test
- Physical Activity & Dietary Assessment & Questionnaires

**Each visit takes about 2 hours**

**Visits 3 – 50** (Group 2 participants only)

**Location: UNB CELLAB Gym**

- Exercise Training
- Submaximal Treadmill Walking Test (Every 4 weeks)

**Visit 51 & 52** (within 1 week of each other)

**Location: UNB CELLAB**

- Weight, height, hip, and waist measurement
- Body Composition
- Bloodwork
- Fitness Test

**Each visit takes about 2 hours**

**Visits 53 – 88** (Group 2 participants only)

**Location: UNB CELLAB Gym**

- Exercise Training
- Submaximal Treadmill Walking Test (Every 4 weeks)

**Visit 89 & 90** (within 1 week of each other)




---

### Location: UNB CELLAB

- Weight, height, hip, and waist measurement
- Body Composition
- Bloodwork
- Fitness Test
- Physical Activity & Dietary Assessment & Questionnaires

**Each visit takes about 2 hours**

### Visit 91 (One year later)

#### Location: UNB CELLAB

- Medical History (Visit 1 only)
- Questionnaires (Visit 1 only)
- Weight, height, hip, and waist measurement
- Body Composition
- Bloodwork
- Fitness Test
- Physical Activity & Dietary Assessment & Questionnaires

**Each visit takes about 2 hours**

### POTENTIAL RISKS AND DISCOMFORT

Study personnel are trained to respond to any emergency and a registered nurse and will be on site during the necessary procedures.

*Physical Activity and Dietary Assessment:* There are no risks associated with wearing a pedometer. It is possible that the pedometer makes you feel uncomfortable, but that is unlikely.

*Body Composition:* During the Bod Pod testing, it is possible that you might experience some light-headedness or dizziness. It is also possible that if you are claustrophobic, that you may begin to have a feeling of being shut-in. A button at your knee while you are inside of the Bod Pod, will allow you to have the door of the Bod Pod open *immediately*. A window on the Bod Pod also will allow you and the technician to see and communicate with one another. There is no physical danger involved in these measurements. Room air is continuously circulated through the Bod Pod compartment when it is closed. The compartment does not lock and the person inside can exit at any time. Your parent/legal guardian will be present at all time during this test with someone from our research staff. The test is performed behind a medical curtain to maintain privacy and ensure nobody see you.

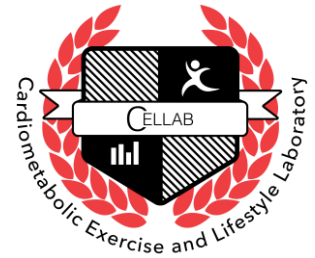

**Exercise Training:** When people exercise for the first time in a long while, there is the possibility of an increased risk of muscle or joint injuries. However, all exercise will be performed in the presence of a trainer who will know exactly what to do in case a physical injury, or any additional concern, occurs. Also, the selected training methods, duration, and Intensity in this program were carefully chosen to minimize injury risk and optimize the benefits for each participant. The research staff is educated in proper exercise prescription for individuals living with diabetes, and will follow the 2018 Diabetes Canada Guidelines for exercise in order to ensure each participant is properly monitored, prepared, and advised as recommended throughout the exercise training program. It is possible that the heart rate monitor worn throughout each session will make you feel uncomfortable, but we have a variety of models that may be used, and discomfort is unlikely.

**Bloodwork:** Some people experience slight discomfort, bleeding and/or bruising during the collection of blood samples. Sometimes people feel dizzy or faint. An infection in your arm can develop if the testing site is not clean, so the nurse will clean your arm with alcohol before taking blood. Every effort will be made to reduce any risks and discomfort. We have a registered nurse that will do all the blood collection.

**Fitness Tests:** There is a possibility of certain changes occurring during the exercise test. Serious complications of exercise testing occur in approximately 1 in 10,000 tests in adults. Such complications may include abnormal blood pressure, fainting, heart rate disorder and, in rare instances, heart attack, stroke and death. Exercise testing may also cause slight injury to muscles and joints, routine discomforts that will go away within three days after the test. Every effort will be made to minimize these risks by reviewing information about your health and fitness before the test and by closely monitoring how your body responds to the exercise. We will reduce these risks by closely monitoring your condition throughout the exercise test. If you experience any abnormal response to the exercise, the session will be stopped.

### **What Are the Potential Benefits of the Study?**

**Benefit to you:** By participating in the study, you will receive information about your health and physical activity level. In addition, you will be provided with a personal trainer and regular access to a fitness facility at no cost to you, which would not be possible during a regular doctor's visit. It is very likely that engaging in this study will improve your health. Participants will likely learn what kind of exercise they can do to continue obtaining health benefits once the project is complete, and better understand why they are getting healthier.

**Benefit to other people:** The main benefit of participating in this study is the knowledge we will gain about how the body responds to exercise, and if it is possible to improve the number of responders among individuals living with prediabetes or Type-2 diabetes.



---

## What Are the Costs of the Study?

There are no costs to you for participating in this study. This study will cover all costs, which include clinic and professional fees, along with the diagnostic and laboratory tests. A parking pass will be provided so you do not have to pay for parking.

## Is the Study Confidential?

Information gathered in this research study may be published or presented in public forums, however your name and other identifying information will not be used or revealed. Medical records that contain your identity will be treated as confidential. Despite efforts to keep your personal information confidential, absolute confidentiality cannot be guaranteed. Your personal information may be disclosed if required by law.

The Research Ethics Board at the University of New Brunswick may also review your research-related records for quality assurance purposes.

Only your consent form will have information that relates to your identification number (ID) number and this will be kept in a locked cabinet within a locked room located at the University of New Brunswick. All other study documents related to you will bear only your assigned ID number. These records will be kept in a locked secure area and only those identified will have access to those records. No information revealing any personal information, such as your name, phone number or address, will leave the University of New Brunswick. All data collected will be entered into computers, however all data will be password protected and data files will not include any identifying information, only the subject ID number. All your data will be kept for 7 years and then will be destroyed.

## Do I Have the Right to Change My Mind?

Your decision to take part in this study is totally up to you. You may refuse to participate or you may quit at any time. Your decision to participate or withdraw from the study will not affect your regular medical care. The investigators reserve the right to end your participation in the study for any reason.

If you are enrolled and subsequently withdraws from the study, any information or biological samples supplied up to that point remains in the possession of the research team and will be retained as data for research purposes.

## What Else Should I Know?

- Any results from this study cannot be used for diagnosis.





- 
- You may request a copy of any images and the blood tests.
  - At your request, a summary of the test results can be provided to your primary care physician.
  - Your primary care physician will not know whether you have agreed to participate in this study or not unless you request that a summary of the test results be provided to him or her. You may request that the test results be provided to your physician at the end of the study.
  - The investigators have no financial interest in the outcome of the study.
  - All the blood samples will be kept for a maximum of 7 years in a locked freezer in our exercise physiology lab, which is a restricted access room. The samples will be kept anonymous; no linkage or genetic tests are anticipated with these samples. They will be destroyed safely according to standard biohazard procedures.

If, in the opinion of the researchers, it is believed that you need further medical follow-up based on standard results you will be advised of this.

**This project has been reviewed by the UNB Research Ethics Board and is on file as REB 2018-168**

### **Potential Changes to Study Protocols due to COVID 19**

Given the potential for the current COVID-19 pandemic to close University of New Brunswick facilities, or restrict face to face data collection, the study protocol will need to change. Below we outline two scenarios.

#### **Scenario 1: Intervention not possible in CELLAB**

Should face to face data collection be approved, but the University of New Brunswick restrict access to on campus facilities, exercise will instead take place at a location of your choice such as your home or a public space. The study timeline, purpose and objectives, and randomization will remain unchanged.

You will still be required to complete the weekly time allotment at the prescribed exercise intensity. Likewise, you will be able to select the time and number of sessions completed each week. However, you will be asked to place the heart rate monitor on yourself. Moreover, you will be asked to use provided steps (or a staircase in your home) and while under supervision by a research staff member via video calling software, complete the training session. You will be asked to report your heart rate every 5 minutes, and the research staff will inform you when you need to increase the intensity.



---

## Scenario 2: Intervention and testing not possible in CELLAB

In addition to perform the exercise in at a location of your choice, the testing will be limited as well. If allow by Public Health and accepted by you, a research assistant will come into your home and performed testing to respect the study timelines.

### 4. Body measurements

Height and weight will be taken with portable equipment

### 5. Body Composition

The BODPOD will no longer be used to estimate body composition. In its place, a handheld Omron HBF-306C bioelectrical impedance analyzer will be temporarily provided. Prior to the test, you will be asked to avoid consuming any food or liquids for 4 hours prior to the test, and to use the bathroom within 30 minutes of the analysis. You will then stand straight up, and hold the monitor with your arms fully extended. The device will then complete its measurement, taking approximately 30 seconds.

### 6. Blood Work at UNB

All tests completed using a blood draw will be dropped from the study besides HbA1c, that will be collected through a finger prick. You will be provided instructions as to how to safely conduct a finger prick, in line with the procedures followed for daily glucose measurements. You will be provided with a small collection tube, which will be used to collect 1  $\mu$ L of blood from the finger prick. The collection tube will then be taken by the research staff to conduct the analysis, and all materials disposed of in line with proper biohazard and sharps waste disposal procedures.

### 7. Fitness Test

In place of the maximal fitness test, a predicted aerobic fitness test will be completed. Specifically, the modified Canadian Aerobic Fitness Test (mCAFT) will be used. You will be provided with a heart rate monitor, the mCAFT music, and sanitized, standardized set of steps. You will also be provided the link to a video showing how to properly put on a heart rate monitor, and how to make sure it is working, as well as clear instructions on how to complete the test. While supervised by a research staff member over an online video chatting software, you will listen to the music and follow the audio cues to step up and down the provided steps at the required cadence, completing 3-minute stages until cut off by the research staff member. You will be asked to report their heart rate between each stage. A predictive equation will then be used to estimate the participant's maximal aerobic fitness.

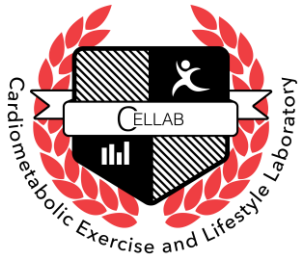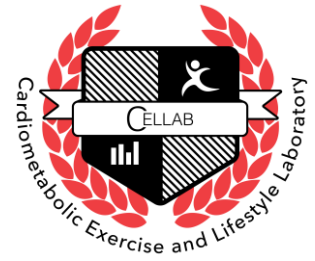

---

## 10. Submaximal Fitness Test

Instead of completing the submaximal treadmill walking tests, every four weeks you will be asked to repeat the mCAFT test, as outlined previously.

### How Can I Get More Information?

To receive additional **information** about this study from the researchers:

- Martin Sénéchal, Ph.D., CEP (506) 451-6889

For questions about your **rights as a research subject**, you may contact:

- Wayne Albert, Dean of the Faculty of Kinesiology (506) 453-4575
- Steven R. Turner Chair of UNB Research Ethic Board (506) 458-7433

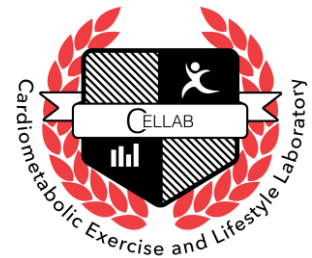

## Signatures

- I have received a copy of this consent form and I have read it. I understand the nature of the study, including the potential risks and benefits. I have had adequate time to consider the information. My questions about the study have been answered.
- I will be given a copy of this document, after signing it.
- By signing this document, I am not waiving any of my legal rights and I understand that I can stop being in the study at any time.
- **I hereby agree to participate in the study outlined throughout this document.** My consent has been given freely.
- I wish to be contacted for future studies. (Additional consent will be required and I will be free to decline participation in any further studies at the time of contact.)

YES  NO

I wish to receive a report of the results of this study when available.

|                                    |           |      |
|------------------------------------|-----------|------|
| Consent of the Participant (Print) | Signature | Date |
|------------------------------------|-----------|------|

### Person Obtaining Consent

To the best of my knowledge, the information that I have provided in response to any questions fairly represents the project. I am committed to conducting this study in compliance with all the ethical standards that apply to projects that involve human subjects.

|              |           |      |
|--------------|-----------|------|
| Name (Print) | Signature | Date |
|--------------|-----------|------|

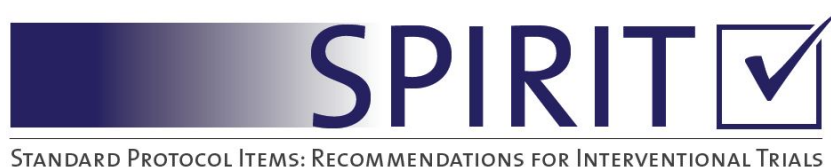

STANDARD PROTOCOL ITEMS: RECOMMENDATIONS FOR INTERVENTIONAL TRIALS

SPIRIT 2013 Checklist: Recommended items to address in a clinical trial protocol and related documents\*

| Section/item                      | Item No | Description                                                                                                                                                                                                                                                                                                       |
|-----------------------------------|---------|-------------------------------------------------------------------------------------------------------------------------------------------------------------------------------------------------------------------------------------------------------------------------------------------------------------------|
| <b>Administrative information</b> |         |                                                                                                                                                                                                                                                                                                                   |
| Title                             | 1       | Descriptive title identifying the study design, population, interventions, and, if applicable, trial acronym<br><b>Completed: Line 1 - 3</b>                                                                                                                                                                      |
| Trial registration                | 2a      | Trial identifier and registry name. If not yet registered, name of intended registry<br><b>Completed – Line 25</b>                                                                                                                                                                                                |
|                                   | 2b      | All items from the World Health Organization Trial Registration Data Set<br><b>Not applicable</b>                                                                                                                                                                                                                 |
| Protocol version                  | 3       | Date and version identifier<br><b>Completed – Line 27</b>                                                                                                                                                                                                                                                         |
| Funding                           | 4       | Sources and types of financial, material, and other support<br><b>Included in online submission as per journal instructions</b>                                                                                                                                                                                   |
| Roles and responsibilities        | 5a      | Names, affiliations, and roles of protocol contributors<br><b>Completed – Lines 5 – 9 &amp; 403 - 408</b>                                                                                                                                                                                                         |
|                                   | 5b      | Name and contact information for the trial sponsor<br><b>Completed – Lines 27 - 35</b>                                                                                                                                                                                                                            |
|                                   | 5c      | Role of study sponsor and funders, if any, in study design; collection, management, analysis, and interpretation of data; writing of the report; and the decision to submit the report for publication, including whether they will have ultimate authority over any of these activities<br><b>Not applicable</b> |
|                                   | 5d      | Composition, roles, and responsibilities of the coordinating centre, steering committee, endpoint adjudication committee, data management team, and other individuals or groups overseeing the trial, if applicable (see Item 21a for data monitoring committee)<br><b>Not applicable</b>                         |

**Introduction**

|    |                                                           |     |                                                                               |
|----|-----------------------------------------------------------|-----|-------------------------------------------------------------------------------|
| 1  |                                                           |     |                                                                               |
| 2  | Background and                                            | 6a  | Description of research question and justification for undertaking the        |
| 3  | rationale                                                 |     | trial, including summary of relevant studies (published and                   |
| 4  |                                                           |     | unpublished) examining benefits and harms for each intervention               |
| 5  |                                                           |     | <b>Completed – Lines 76 - 125</b>                                             |
| 6  |                                                           |     |                                                                               |
| 7  |                                                           | 6b  | Explanation for choice of comparators                                         |
| 8  |                                                           |     | <b>Completed – Lines 76 - 125</b>                                             |
| 9  |                                                           |     |                                                                               |
| 10 | Objectives                                                | 7   | Specific objectives or hypotheses                                             |
| 11 |                                                           |     | <b>Completed – Lines 112 – 118</b>                                            |
| 12 |                                                           |     |                                                                               |
| 13 |                                                           |     |                                                                               |
| 14 | Trial design                                              | 8   | Description of trial design including type of trial (eg, parallel group,      |
| 15 |                                                           |     | crossover, factorial, single group), allocation ratio, and framework          |
| 16 |                                                           |     | (eg, superiority, equivalence, noninferiority, exploratory)                   |
| 17 |                                                           |     | <b>Completed – Line 112</b>                                                   |
| 18 |                                                           |     |                                                                               |
| 19 |                                                           |     |                                                                               |
| 20 | <b>Methods: Participants, interventions, and outcomes</b> |     |                                                                               |
| 21 |                                                           |     |                                                                               |
| 22 | Study setting                                             | 9   | Description of study settings (eg, community clinic, academic                 |
| 23 |                                                           |     | hospital) and list of countries where data will be collected. Reference       |
| 24 |                                                           |     | to where list of study sites can be obtained                                  |
| 25 |                                                           |     | <b>Completed – Lines 128 - 131</b>                                            |
| 26 |                                                           |     |                                                                               |
| 27 |                                                           |     |                                                                               |
| 28 | Eligibility criteria                                      | 10  | Inclusion and exclusion criteria for participants. If applicable, eligibility |
| 29 |                                                           |     | criteria for study centres and individuals who will perform the               |
| 30 |                                                           |     | interventions (eg, surgeons, psychotherapists)                                |
| 31 |                                                           |     | <b>Completed – Lines 133 - 148</b>                                            |
| 32 |                                                           |     |                                                                               |
| 33 |                                                           |     |                                                                               |
| 34 | Interventions                                             | 11a | Interventions for each group with sufficient detail to allow replication,     |
| 35 |                                                           |     | including how and when they will be administered                              |
| 36 |                                                           |     | <b>Completed – Lines 166 – 219</b>                                            |
| 37 |                                                           |     |                                                                               |
| 38 |                                                           | 11b | Criteria for discontinuing or modifying allocated interventions for a         |
| 39 |                                                           |     | given trial participant (eg, drug dose change in response to harms,           |
| 40 |                                                           |     | participant request, or improving/worsening disease)                          |
| 41 |                                                           |     | <b>Completed – Lines 221 – 234</b>                                            |
| 42 |                                                           |     |                                                                               |
| 43 |                                                           |     |                                                                               |
| 44 |                                                           | 11c | Strategies to improve adherence to intervention protocols, and any            |
| 45 |                                                           |     | procedures for monitoring adherence (eg, drug tablet return,                  |
| 46 |                                                           |     | laboratory tests)                                                             |
| 47 |                                                           |     | <b>Completed – Lines 183 - 191</b>                                            |
| 48 |                                                           |     |                                                                               |
| 49 |                                                           | 11d | Relevant concomitant care and interventions that are permitted or             |
| 50 |                                                           |     | prohibited during the trial                                                   |
| 51 |                                                           |     | <b>Not applicable</b>                                                         |
| 52 |                                                           |     |                                                                               |
| 53 |                                                           |     |                                                                               |
| 54 |                                                           |     |                                                                               |
| 55 |                                                           |     |                                                                               |
| 56 |                                                           |     |                                                                               |
| 57 |                                                           |     |                                                                               |
| 58 |                                                           |     |                                                                               |
| 59 |                                                           |     |                                                                               |
| 60 |                                                           |     |                                                                               |

|    |                      |    |                                                                                                                                                                                                                                                                                                                                                                                |
|----|----------------------|----|--------------------------------------------------------------------------------------------------------------------------------------------------------------------------------------------------------------------------------------------------------------------------------------------------------------------------------------------------------------------------------|
| 1  |                      |    |                                                                                                                                                                                                                                                                                                                                                                                |
| 2  | Outcomes             | 12 | Primary, secondary, and other outcomes, including the specific measurement variable (eg, systolic blood pressure), analysis metric (eg, change from baseline, final value, time to event), method of aggregation (eg, median, proportion), and time point for each outcome. Explanation of the clinical relevance of chosen efficacy and harm outcomes is strongly recommended |
| 3  |                      |    |                                                                                                                                                                                                                                                                                                                                                                                |
| 4  |                      |    |                                                                                                                                                                                                                                                                                                                                                                                |
| 5  |                      |    |                                                                                                                                                                                                                                                                                                                                                                                |
| 6  |                      |    |                                                                                                                                                                                                                                                                                                                                                                                |
| 7  |                      |    |                                                                                                                                                                                                                                                                                                                                                                                |
| 8  |                      |    |                                                                                                                                                                                                                                                                                                                                                                                |
| 9  |                      |    | <b>Completed – Lines 247 - 314</b>                                                                                                                                                                                                                                                                                                                                             |
| 10 |                      |    |                                                                                                                                                                                                                                                                                                                                                                                |
| 11 | Participant timeline | 13 | Time schedule of enrolment, interventions (including any run-ins and washouts), assessments, and visits for participants. A schematic diagram is highly recommended (see Figure)                                                                                                                                                                                               |
| 12 |                      |    |                                                                                                                                                                                                                                                                                                                                                                                |
| 13 |                      |    |                                                                                                                                                                                                                                                                                                                                                                                |
| 14 |                      |    |                                                                                                                                                                                                                                                                                                                                                                                |
| 15 |                      |    | <b>Completed – See attached figure</b>                                                                                                                                                                                                                                                                                                                                         |
| 16 |                      |    |                                                                                                                                                                                                                                                                                                                                                                                |
| 17 | Sample size          | 14 | Estimated number of participants needed to achieve study objectives and how it was determined, including clinical and statistical assumptions supporting any sample size calculations                                                                                                                                                                                          |
| 18 |                      |    |                                                                                                                                                                                                                                                                                                                                                                                |
| 19 |                      |    |                                                                                                                                                                                                                                                                                                                                                                                |
| 20 |                      |    |                                                                                                                                                                                                                                                                                                                                                                                |
| 21 |                      |    | <b>Completed – Lines 339 - 349</b>                                                                                                                                                                                                                                                                                                                                             |
| 22 |                      |    |                                                                                                                                                                                                                                                                                                                                                                                |
| 23 | Recruitment          | 15 | Strategies for achieving adequate participant enrolment to reach target sample size                                                                                                                                                                                                                                                                                            |
| 24 |                      |    |                                                                                                                                                                                                                                                                                                                                                                                |
| 25 |                      |    |                                                                                                                                                                                                                                                                                                                                                                                |
| 26 |                      |    | <b>Completed – Lines 150 – 156</b>                                                                                                                                                                                                                                                                                                                                             |

### Methods: Assignment of interventions (for controlled trials)

#### Allocation:

|    |                                  |     |                                                                                                                                                                                                                                                                                                                                                          |
|----|----------------------------------|-----|----------------------------------------------------------------------------------------------------------------------------------------------------------------------------------------------------------------------------------------------------------------------------------------------------------------------------------------------------------|
| 27 |                                  |     |                                                                                                                                                                                                                                                                                                                                                          |
| 28 |                                  |     |                                                                                                                                                                                                                                                                                                                                                          |
| 29 |                                  |     |                                                                                                                                                                                                                                                                                                                                                          |
| 30 |                                  |     |                                                                                                                                                                                                                                                                                                                                                          |
| 31 | Sequence generation              | 16a | Method of generating the allocation sequence (eg, computer-generated random numbers), and list of any factors for stratification. To reduce predictability of a random sequence, details of any planned restriction (eg, blocking) should be provided in a separate document that is unavailable to those who enrol participants or assign interventions |
| 32 |                                  |     |                                                                                                                                                                                                                                                                                                                                                          |
| 33 |                                  |     |                                                                                                                                                                                                                                                                                                                                                          |
| 34 |                                  |     |                                                                                                                                                                                                                                                                                                                                                          |
| 35 |                                  |     |                                                                                                                                                                                                                                                                                                                                                          |
| 36 |                                  |     |                                                                                                                                                                                                                                                                                                                                                          |
| 37 |                                  |     |                                                                                                                                                                                                                                                                                                                                                          |
| 38 |                                  |     |                                                                                                                                                                                                                                                                                                                                                          |
| 39 |                                  |     | <b>Completed – Lines 324 - 337</b>                                                                                                                                                                                                                                                                                                                       |
| 40 |                                  |     |                                                                                                                                                                                                                                                                                                                                                          |
| 41 | Allocation concealment mechanism | 16b | Mechanism of implementing the allocation sequence (eg, central telephone; sequentially numbered, opaque, sealed envelopes), describing any steps to conceal the sequence until interventions are assigned                                                                                                                                                |
| 42 |                                  |     |                                                                                                                                                                                                                                                                                                                                                          |
| 43 |                                  |     |                                                                                                                                                                                                                                                                                                                                                          |
| 44 |                                  |     |                                                                                                                                                                                                                                                                                                                                                          |
| 45 |                                  |     |                                                                                                                                                                                                                                                                                                                                                          |
| 46 |                                  |     | <b>Completed – Lines 324 - 337</b>                                                                                                                                                                                                                                                                                                                       |
| 47 |                                  |     |                                                                                                                                                                                                                                                                                                                                                          |
| 48 | Implementation                   | 16c | Who will generate the allocation sequence, who will enrol participants, and who will assign participants to interventions                                                                                                                                                                                                                                |
| 49 |                                  |     |                                                                                                                                                                                                                                                                                                                                                          |
| 50 |                                  |     | <b>Completed – Lines 327 - 328</b>                                                                                                                                                                                                                                                                                                                       |
| 51 |                                  |     |                                                                                                                                                                                                                                                                                                                                                          |
| 52 | Blinding (masking)               | 17a | Who will be blinded after assignment to interventions (eg, trial participants, care providers, outcome assessors, data analysts), and how                                                                                                                                                                                                                |
| 53 |                                  |     |                                                                                                                                                                                                                                                                                                                                                          |
| 54 |                                  |     |                                                                                                                                                                                                                                                                                                                                                          |
| 55 |                                  |     |                                                                                                                                                                                                                                                                                                                                                          |
| 56 |                                  |     | <b>Completed – Lines 316 - 322</b>                                                                                                                                                                                                                                                                                                                       |
| 57 |                                  |     |                                                                                                                                                                                                                                                                                                                                                          |
| 58 |                                  |     |                                                                                                                                                                                                                                                                                                                                                          |
| 59 |                                  |     |                                                                                                                                                                                                                                                                                                                                                          |
| 60 |                                  |     |                                                                                                                                                                                                                                                                                                                                                          |

- 1  
2  
3  
4  
5  
6  
7
- 17b If blinded, circumstances under which unblinding is permissible, and procedure for revealing a participant's allocated intervention during the trial

**Unblinding is not necessary for this trial.**

8  
9

**Methods: Data collection, management, and analysis**

10  
11  
12  
13  
14  
15  
16

Data collection methods 18a Plans for assessment and collection of outcome, baseline, and other trial data, including any related processes to promote data quality (eg, duplicate measurements, training of assessors) and a description of study instruments (eg, questionnaires, laboratory tests) along with their reliability and validity, if known. Reference to where data collection forms can be found, if not in the protocol

**Completed – Lines 247 - 314**

- 17  
18  
19  
20  
21  
22  
23
- 18b Plans to promote participant retention and complete follow-up, including list of any outcome data to be collected for participants who discontinue or deviate from intervention protocols

**Completed – Lines 232 - 234**

24  
25  
26  
27  
28  
29

Data management 19 Plans for data entry, coding, security, and storage, including any related processes to promote data quality (eg, double data entry; range checks for data values). Reference to where details of data management procedures can be found, if not in the protocol

**Completed – Lines 236 - 245**

30  
31  
32  
33  
34

Statistical methods 20a Statistical methods for analysing primary and secondary outcomes. Reference to where other details of the statistical analysis plan can be found, if not in the protocol

**Completed – Lines 350 - 379**

- 35  
36  
37  
38  
39
- 20b Methods for any additional analyses (eg, subgroup and adjusted analyses)

**Not applicable**

- 40  
41  
42  
43  
44
- 20c Definition of analysis population relating to protocol non-adherence (eg, as randomised analysis), and any statistical methods to handle missing data (eg, multiple imputation)

**Not applicable due to the nature of our analyses.**

45  
46  
47  
48

**Methods: Monitoring**

49  
50  
51  
52  
53  
54  
55

Data monitoring 21a Composition of data monitoring committee (DMC); summary of its role and reporting structure; statement of whether it is independent from the sponsor and competing interests; and reference to where further details about its charter can be found, if not in the protocol. Alternatively, an explanation of why a DMC is not needed

**Not in place for this trial**



|    |                                 |     |                                                                          |
|----|---------------------------------|-----|--------------------------------------------------------------------------|
| 1  |                                 |     |                                                                          |
| 2  |                                 | 21b | Description of any interim analyses and stopping guidelines,             |
| 3  |                                 |     | including who will have access to these interim results and make the     |
| 4  |                                 |     | final decision to terminate the trial                                    |
| 5  |                                 |     | <b>Not in place for this trial</b>                                       |
| 6  |                                 |     |                                                                          |
| 7  | Harms                           | 22  | Plans for collecting, assessing, reporting, and managing solicited and   |
| 8  |                                 |     | spontaneously reported adverse events and other unintended effects       |
| 9  |                                 |     | of trial interventions or trial conduct                                  |
| 10 |                                 |     | <b>Not applicable</b>                                                    |
| 11 |                                 |     |                                                                          |
| 12 |                                 |     |                                                                          |
| 13 | Auditing                        | 23  | Frequency and procedures for auditing trial conduct, if any, and         |
| 14 |                                 |     | whether the process will be independent from investigators and the       |
| 15 |                                 |     | sponsor                                                                  |
| 16 |                                 |     | <b>Not in place for this trial</b>                                       |
| 17 |                                 |     |                                                                          |
| 18 |                                 |     |                                                                          |
| 19 | <b>Ethics and dissemination</b> |     |                                                                          |
| 20 |                                 |     |                                                                          |
| 21 | Research ethics                 | 24  | Plans for seeking research ethics committee/institutional review         |
| 22 | approval                        |     | board (REC/IRB) approval                                                 |
| 23 |                                 |     | <b>Completed – Lines 378 - 380</b>                                       |
| 24 |                                 |     |                                                                          |
| 25 | Protocol                        | 25  | Plans for communicating important protocol modifications (eg,            |
| 26 | amendments                      |     | changes to eligibility criteria, outcomes, analyses) to relevant parties |
| 27 |                                 |     | (eg, investigators, REC/IRBs, trial participants, trial registries,      |
| 28 |                                 |     | journals, regulators)                                                    |
| 29 |                                 |     | <b>Completed – Lines 378 - 380</b>                                       |
| 30 |                                 |     |                                                                          |
| 31 |                                 |     |                                                                          |
| 32 | Consent or                      | 26a | Who will obtain informed consent or assent from potential trial          |
| 33 | assent                          |     | participants or authorised surrogates, and how (see Item 32)             |
| 34 |                                 |     | <b>Completed – Lines 382 - 389</b>                                       |
| 35 |                                 |     |                                                                          |
| 36 |                                 |     |                                                                          |
| 37 |                                 | 26b | Additional consent provisions for collection and use of participant      |
| 38 |                                 |     | data and biological specimens in ancillary studies, if applicable        |
| 39 |                                 |     | <b>Not applicable</b>                                                    |
| 40 |                                 |     |                                                                          |
| 41 | Confidentiality                 | 27  | How personal information about potential and enrolled participants       |
| 42 |                                 |     | will be collected, shared, and maintained in order to protect            |
| 43 |                                 |     | confidentiality before, during, and after the trial                      |
| 44 |                                 |     | <b>Completed – Lines 233 - 237</b>                                       |
| 45 |                                 |     |                                                                          |
| 46 |                                 |     |                                                                          |
| 47 | Declaration of                  | 28  | Financial and other competing interests for principal investigators for  |
| 48 | interests                       |     | the overall trial and each study site                                    |
| 49 |                                 |     | <b>Completed – Line 410</b>                                              |
| 50 |                                 |     |                                                                          |
| 51 | Access to data                  | 29  | Statement of who will have access to the final trial dataset, and        |
| 52 |                                 |     | disclosure of contractual agreements that limit such access for          |
| 53 |                                 |     | investigators                                                            |
| 54 |                                 |     | <b>Completed – Lines 416 - 417</b>                                       |
| 55 |                                 |     |                                                                          |
| 56 |                                 |     |                                                                          |
| 57 |                                 |     |                                                                          |
| 58 |                                 |     |                                                                          |
| 59 |                                 |     |                                                                          |
| 60 |                                 |     |                                                                          |

|    |                   |     |                                                                        |
|----|-------------------|-----|------------------------------------------------------------------------|
| 1  |                   |     |                                                                        |
| 2  | Ancillary and     | 30  | Provisions, if any, for ancillary and post-trial care, and for         |
| 3  | post-trial care   |     | compensation to those who suffer harm from trial participation         |
| 4  |                   |     | <b>Not applicable</b>                                                  |
| 5  |                   |     |                                                                        |
| 6  | Dissemination     | 31a | Plans for investigators and sponsor to communicate trial results to    |
| 7  | policy            |     | participants, healthcare professionals, the public, and other relevant |
| 8  |                   |     | groups (eg, via publication, reporting in results databases, or other  |
| 9  |                   |     | data sharing arrangements), including any publication restrictions     |
| 10 |                   |     | <b>Completed – Lines 391 - 396</b>                                     |
| 11 |                   |     |                                                                        |
| 12 |                   |     |                                                                        |
| 13 |                   | 31b | Authorship eligibility guidelines and any intended use of professional |
| 14 |                   |     | writers                                                                |
| 15 |                   |     | <b>Not applicable (no plans for professional authors, all authors</b>  |
| 16 |                   |     | <b>and contributions are listed above)</b>                             |
| 17 |                   |     |                                                                        |
| 18 |                   |     |                                                                        |
| 19 |                   | 31c | Plans, if any, for granting public access to the full protocol,        |
| 20 |                   |     | participant-level dataset, and statistical code                        |
| 21 |                   |     | <b>Not applicable</b>                                                  |
| 22 |                   |     |                                                                        |
| 23 |                   |     |                                                                        |
| 24 | <b>Appendices</b> |     |                                                                        |
| 25 |                   |     |                                                                        |
| 26 | Informed consent  | 32  | Model consent form and other related documentation given to            |
| 27 | materials         |     | participants and authorised surrogates                                 |
| 28 |                   |     | <b>Included</b>                                                        |
| 29 |                   |     |                                                                        |
| 30 | Biological        | 33  | Plans for collection, laboratory evaluation, and storage of biological |
| 31 | specimens         |     | specimens for genetic or molecular analysis in the current trial and   |
| 32 |                   |     | for future use in ancillary studies, if applicable                     |
| 33 |                   |     | <b>Not applicable</b>                                                  |
| 34 |                   |     |                                                                        |

---

\*It is strongly recommended that this checklist be read in conjunction with the SPIRIT 2013 Explanation & Elaboration for important clarification on the items. Amendments to the protocol should be tracked and dated. The SPIRIT checklist is copyrighted by the SPIRIT Group under the Creative Commons "[Attribution-NonCommercial-NoDerivs 3.0 Unported](https://creativecommons.org/licenses/by-nc-nd/3.0/)" license.
